1

2

3

4

5 **Another's pain in my brain: No evidence that placebo analgesia**  
6 **affects the sensory-discriminative component in empathy for pain**

7 **Helena Hartmann<sup>a</sup>, Markus Rütgen<sup>a</sup>, Federica Riva<sup>a</sup>, & Claus Lamm<sup>a\*</sup>**

8 <sup>a</sup> *Social, Cognitive and Affective Neuroscience Unit, Department of Cognition, Emotion, and*  
9 *Methods in Psychology, Faculty of Psychology, University of Vienna, Vienna, Austria*

10

11

12

13

14

15 \* Corresponding author: [claus.lamm@univie.ac.at](mailto:claus.lamm@univie.ac.at), +43-1-4277-47130, Social, Cognitive and  
16 Affective Neuroscience Unit, University of Vienna, Liebiggasse 5, 1010 Vienna, Austria

## 17 **Highlights**

- 18 • Investigated placebo modulation of somatosensory and affective components of pain
- 19 • Localized placebo analgesia effects for self-report and fMRI of first-hand pain
- 20 • No evidence for such effects in empathy for pain
- 21 • Suggests that somatosensory sharing does not play a critical role in pain empathy

22 **Abstract**

23 The shared representations account of empathy suggests that sharing other people's  
24 emotions relies on neural processes similar to those engaged when directly experiencing  
25 such emotions. Recent research corroborated this by showing that placebo analgesia  
26 resulted in reduced pain empathy and decreased activation in shared neural networks.  
27 However, those studies did not report any placebo-related variation of somatosensory  
28 engagement during pain empathy. The experimental paradigms used in these studies did not  
29 direct attention towards a specific body part in pain, which may explain the absence of  
30 effects for somatosensation. The main objective of this preregistered study was to implement  
31 a paradigm overcoming this limitation, and to investigate whether placebo analgesia may  
32 also modulate the sensory-discriminative component of empathy for pain. We induced a  
33 localized, first-hand placebo analgesia effect in the right hand of 45 participants by means of  
34 a placebo gel and conditioning techniques, and compared this to the left hand as a control  
35 condition. Participants underwent a pain task in the MRI scanner, receiving painful or non-  
36 painful electrical stimulation on their left or right hand, or witnessing another person receiving  
37 such stimulation. In contrast to a robust localized placebo analgesia effect for self-  
38 experienced pain, the empathy condition showed no differences between the two hands,  
39 neither for behavioral nor neural responses. We thus report no evidence for somatosensory  
40 sharing in empathy, while replicating previous studies showing overlapping brain activity in  
41 the affective-motivational component for first-hand and empathy for pain. Hence, in a more  
42 rigorous test aiming to overcome limitations of previous work, we again find no causal  
43 evidence for the engagement of somatosensory sharing in empathy. Our study refines the  
44 understanding of the neural underpinnings of empathy for pain, and the use of placebo  
45 analgesia in investigating such models.

46 **Keywords**

47 empathy, social, electrical pain, placebo analgesia, somatosensation, fMRI

## 48 **1 Introduction**

49 Empathy is a multifaceted psychological construct fundamental for human social  
50 interactions and relationships (e.g. Marsh, 2018 for recent review). While many definitions of  
51 empathy have been proposed, here we define empathy as an affective state isomorphic to  
52 the state of another person, encompassing a partial and experiential sharing of that person's  
53 affect (Lamm et al., 2019; Hall & Schwartz, 2019 for overviews). Studies in recent years have  
54 already brought considerable advances in our understanding of the neural mechanisms  
55 underlying empathy (de Vignemont & Singer, 2006; Keysers & Gazzola, 2006; Lamm,  
56 Rütgen, & Wagner, 2019; Lockwood, 2016; Marsh, 2018; Preston & de Waal, 2002 for  
57 reviews; Jauniaux, Khatibi, Rainville, & Jackson, 2019; Lamm, Decety, & Singer, 2011 for  
58 meta-analyses). According to one influential account, the shared representations account,  
59 the experience of another individual's emotion recruits neural processes that are (partially)  
60 functionally equivalent to those engaged during the first-hand experience of that emotion  
61 (Bastiaansen, Thioux, & Keysers, 2009; Lamm, Bukowski, & Silani, 2016; Lamm &  
62 Majdandžić, 2015 for reviews). Yet, apart from some general debate on the validity of this  
63 account (Zaki et al., 2016 for a review; but see also Zhou et al., 2020 for a recent preprint),  
64 there exists an explanatory gap regarding the relative contribution of somatosensory,  
65 compared to affective, brain regions to empathy.

66 Pain is widely used to study the neural underpinnings of empathy (Fan et al., 2011;  
67 Jauniaux et al., 2019; Lamm et al., 2011; Timmers et al., 2018 for meta-analyses). Classical  
68 first-hand pain processing is subdivided into two distinct brain networks, whose related brain  
69 activities map onto the first-hand experience of pain (Osborn & Derbyshire, 2010; Ploner,  
70 Gross, Timmermann, & Schnitzler, 2002; Jauniaux et al., 2019 for a meta-analysis; Tracey &  
71 Mantyh, 2007; Zaki, Wager, Singer, Keysers, & Gazzola, 2016 for reviews). Primary and  
72 secondary somatosensory cortices (S1/S2) encode information related to sensory-  
73 discriminative features of pain, such as location, timing or physical characteristics (Keysers,  
74 Kaas, & Gazzola, 2010; Vierck, Whitsel, Favorov, Brown, & Tommerdahl, 2013 for reviews).  
75 In turn, activity in anterior/midcingulate cortices (ACC/MCC) and anterior insula (AI) has been

## Somatosensory empathic sharing

76 associated with affective-motivational aspects of pain, such as its subjective unpleasantness  
77 (Lockwood, 2016 for a review; Singer et al., 2004). While activation associated with the  
78 sensory-discriminative component is usually represented contralateral to the location of an  
79 applied stimulus (especially for S1, but also S2; Bingel et al., 2004; Haggard, Iannetti, &  
80 Longo, 2013; Ogino, Nemoto, & Goto, 2005; Omori et al., 2013; Ritter, Hebart, Wolbers, &  
81 Bingel, 2014), this has not been reported for the affective-motivational component (Lamm et  
82 al., 2011 for a meta-analysis). However, the relative importance of each component, and  
83 specifically the contribution of somatosensory processing to empathic pain experiences,  
84 remains controversial.

85 Numerous fMRI and EEG studies have demonstrated that receiving pain oneself and  
86 empathizing with another person in pain recruit overlapping activation in both of these pain  
87 processing components, providing possible evidence for shared representations (Lamm et  
88 al., 2011 for a meta-analysis; see Singer & Frith, 2005; Singer & Lamm, 2009 for reviews).  
89 For example, many studies continuously observed this overlap in bilateral AI and anterior  
90 MCC (aMCC), speaking for the affective-motivational component as the “core” of pain  
91 empathy processing (e.g. Benuzzi et al., 2018; Corradi-Dell’Acqua et al., 2011; Jackson et  
92 al., 2005; Singer et al., 2004; see Ding et al., 2019; Jauniaux et al., 2019 for meta-analyses).  
93 In addition, others reported overlapping activation in sensorimotor and somatosensory brain  
94 areas, highlighting the importance of the sensory-discriminative component for empathic pain  
95 experiences (e.g. Avenanti, Buetti, Galati, & Aglioti, 2005; Bufalari, Aprile, Avenanti, di Russo,  
96 & Aglioti, 2007; Gallo et al., 2018; Lamm, Nusbaum, Meltzoff, & Decety, 2007; Motoyama,  
97 Ogata, Hoka, & Tobimatsu, 2017; Riečanský & Lamm, 2019 for a review). Interestingly,  
98 results regarding the latter have only been reported when using specific types of paradigms.

99 To test the role of brain areas underpinning empathic responses more specifically and go  
100 beyond correlational evidence for shared activations, causal methods, such as  
101 psychopharmacological manipulations, have recently been used (Gallo et al., 2018). Placebo  
102 analgesia has been shown to reliably reduce first-hand pain using global (orally administered  
103 pill) or local (topically applied gel/cream) manipulations with no active pharmacological

## Somatosensory empathic sharing

104 compound (Amanzio, Benedetti, Porro, Palermo, & Cauda, 2013 for a meta-analysis;  
105 Benedetti & Piedimonte, 2019; Colloca, Klinger, Flor, & Bingel, 2013; Wager & Atlas, 2015  
106 for reviews; Corsi & Colloca, 2017). Rütgen, Seidel, Silani, et al. (2015) argued that if  
107 empathy for pain is indeed directly grounded in the experience of first-hand pain, placebo  
108 analgesia should also result in decreased empathy for pain. In three consecutive studies,  
109 they observed reduced self-reported empathy in participants in whom placebo analgesia had  
110 been induced (Rütgen et al., 2018; Rütgen, Seidel, Riečanský, et al., 2015; Rütgen, Seidel,  
111 Silani, et al., 2015). These results were later replicated by another group of researchers  
112 using the painkiller acetaminophen (Mischkowski et al., 2016). Imaging and EEG data further  
113 showed diminished activation during empathic pain processing in areas coding for the  
114 affective-motivational component (Rütgen, Seidel, Silani, et al., 2015) as well as reduced  
115 amplitudes of P2, an event-related potential (ERP) component (Rütgen et al., 2018; Rütgen,  
116 Seidel, Riečanský, et al., 2015). This component indexes neural computations related to the  
117 affective pain processing network and possibly also to somatosensory processing, as  
118 indicated by source localization studies (Crucchi et al., 2008; Perchet et al., 2012).

119 While these results suggest that empathy for pain is grounded in similar neural processes  
120 as first-hand pain (but see Lamm et al., 2019 and Zaki et al., 2016 for critical discussions),  
121 they also indicate that this neural sharing might only be partial and limited to a sharing of  
122 *affective* processes and representations. This brings back to the fore the unresolved issue  
123 about the role of the sensory-discriminative component in pain empathy (Fabi & Leuthold,  
124 2017; Lamm et al., 2007; Loggia, Mogil, & Bushnell, 2008; Riečanský & Lamm, 2019 for a  
125 review; Singer et al., 2004). The previous studies from our lab did not report any variation in  
126 somatosensory activation by placebo analgesia, even when lowering statistical thresholds  
127 (Rütgen, Seidel, Riečanský, et al., 2015; Rütgen, Seidel, Silani, et al., 2015). This is  
128 surprising, given that placebo analgesia generally affects both components in first-hand pain  
129 (Benedetti, Mayberg, Wager, Stohler, & Zubieta, 2005; Wager & Atlas, 2015 for reviews).  
130 However, the experimental paradigm used in these studies may not have been tailored to  
131 provoke the engagement of somatosensory processes in the empathic experience, making

## Somatosensory empathic sharing

132 their potential modulation by placebo induction difficult to discern (Keysers et al., 2010;  
133 Lamm et al., 2011). In fact, it has been suggested that *picture-based* empathy for pain  
134 paradigms directing the (visual and principal) attention of participants to the specific body  
135 part in pain, might be required to observe activation in somatosensory areas (e.g. visual input  
136 of a needle penetrating the hand; Timmers et al., 2018; Xiang, Wang, Gao, Zhang, & Cui,  
137 2018 for overviews). Previous studies, however, employed a *cue-based* task, where facial  
138 expressions and abstract cues (Rütgen, Seidel, Silani, et al., 2015) or only abstract cues  
139 (Rütgen et al., 2018; Rütgen, Seidel, Riečanský, et al., 2015) indicated electrical stimulation  
140 given to the participants themselves or a second person. Thus, the task may not have been  
141 sufficiently sensitive to detect somatosensory modulation.

142 In this preregistered study, we therefore aimed to clarify the contribution of somatosensory  
143 processing in empathy for pain using an experimental paradigm allowing us to overcome the  
144 potential limitations of our previous research. To this end, we combined a causal  
145 experimental manipulation, consisting of a localized induction of placebo analgesia, with a  
146 paradigm putting a stronger emphasis on somatosensory aspects of the (empathic) pain  
147 experience than previous paradigms. More precisely, placebo analgesia was induced for one  
148 hand only, and participants' attention was explicitly directed to the targeted hand by means of  
149 visual stimuli. In other words, we specifically optimized the study design in a way to maximize  
150 sensitivity for a potential placebo-driven modulation of somatosensory brain activity.

151 This motivated the following preregistered, directional hypotheses: First, we predicted  
152 reductions in first-hand and empathy for pain as well as unpleasantness ratings for the right  
153 hand, where placebo analgesia was induced, compared to the left hand acting as a control.  
154 Second, we hypothesized that the sensory-discriminative component of pain empathy would  
155 be modulated in a similar fashion by placebo analgesia as the affective-motivational  
156 component – i.e., that neural responses related to the right hand would be reduced in S1 and  
157 S2 compared to the left hand – and that this would trigger correspondingly reduced neural  
158 responses in bilateral AI and aMCC.

## 159 **2 Materials and methods**

### 160 **2.1 Data and code availability statement**

161 The data was newly acquired for the present study. Unthresholded statistical maps will be  
162 made available via an online repository upon acceptance and stimuli templates for the pain  
163 task are uploaded within the Open Science Framework (OSF) project ([osf.io/2q3zu/](https://osf.io/2q3zu/)).

### 164 **2.2 Preregistration**

165 We report how we determined our sample size, all data exclusions, all manipulations, and  
166 all measures in the study. This study was preregistered on the OSF prior to any creation of  
167 data (Hartmann, Rütgen, Sladky, & Lamm, 2018; preregistration: [osf.io/uwzb5/](https://osf.io/uwzb5/); addendum:  
168 [osf.io/h7v9p/](https://osf.io/h7v9p/)) and was designed to extend and specify the results of Rütgen, Seidel, Silani, et  
169 al. (2015) in regard to somatosensory sharing. Methods reported below are therefore  
170 reproduced partly verbatim from the preregistration. Note that the preregistered plan contains  
171 a second research question that is not part of the present paper but will be reported  
172 elsewhere. In the following methods and results, we clearly distinguish preregistered  
173 procedures and analyses from those added post hoc.

### 174 **2.3 Participants**

175 Participants were recruited by means of flyers and online advertising in Vienna, Austria  
176 and via an existing database of study participants. Upon interest, they were screened by  
177 means of an online questionnaire (see A.1 in Supplement A for detailed information  
178 regarding exclusions). An *a priori* power analysis using G\*Power 3 (Faul et al., 2007) was  
179 conducted using a conservative average of the lowest effect sizes from previous placebo  
180 empathy analgesia studies (one-tailed paired *t*-test, Cohen's  $d = .79$  to  $.44$  for self-report and  
181  $.40$  to  $.39$  for affective brain areas; Rütgen, Seidel, Rieckens, & Lamm, 2015; Rütgen,  
182 Seidel, Silani, et al., 2015) to calculate the needed sample size to detect a medium effect  
183 size of  $d = .40$  at a standard error probability of  $\alpha = .05$  with a power of  $1 - \beta = 0.8$ . This  
184 yielded a sample size of 41 participants. However, considering that the modulation of  
185 placebo analgesia might not be equal for somatosensory compared to previously reported  
186 affective brain regions, a total of 45 placebo responders was set as the stopping-rule. The  
187 exclusion of nonresponders in regard to the placebo manipulation was crucial to obtain a



188 sample of participants showing a robust localized, first-hand placebo analgesia effect, in  
189 order to investigate a transfer of this effect to empathy. We originally included three  
190 measures to identify nonresponders in our preregistration, as per the criteria in Rütgen,  
191 Seidel, Silani, et al. (2015). During data collection, we uploaded an addendum to include a  
192 fourth measure we had previously overlooked. This measure was not possible in the  
193 previous study we oriented our procedures on but was added due to our within-subjects  
194 design in order to better identify nonresponders, maximize the placebo responsiveness of the  
195 final sample and bolster the interpretability of our results. We had not observed or analysed  
196 any of the collected data when preregistering this addendum. Importantly, this was also the  
197 criterion that identified almost all of the nonresponders (see also A.2 in Supplement A).

198 Our final sample included 22 males and 23 females (Age:  $M \pm SD = 23.84 \pm 2.73$  years,  
199 range = 19-32; all right-handed with laterality quotients (LQs)  $\geq 80$  and normal or corrected-  
200 to-normal vision). We purposefully recruited only strongly right-handed participants and did  
201 not counterbalance the location where placebo analgesia was induced between participants  
202 to avoid laterality problems in our fMRI analyses, as well as to increase sample homogeneity  
203 and comparability of the induction procedure. Before the commencement of the study, five  
204 pilot participants were tested to confirm the existence of a localized, first-hand placebo  
205 analgesia effect and improve study procedures, but these datasets were not included in the  
206 final sample. All participants gave written consent at the outset of each session. The study  
207 was approved by the ethics committee of the Medical University of Vienna (EK-Nr. 661/2011)  
208 and performed in line with the latest revision of the Declaration of Helsinki (2013).

## 209 **2.4 Procedure**

210 The study consisted of two parts: First, participants came alone for a one-hour session to  
211 the lab, where they filled out questionnaires on a computer, and had photos of their hands  
212 taken that were used as individualized stimulus material for the scanning session. After an  
213 average interval of  $32.86 \pm 29.16$  ( $M \pm SD$ ) days, participants came to the MRI scanner  
214 where they took part in the main experiment. Each one arrived together with a second  
215 person (who was a female confederate of similar age invited by the experimenters acting as

## Somatosensory empathic sharing

216 a second participant, as per Rütgen, Seidel, Silani, et al., 2015). The experimenter explained  
217 to both that the goal of the study was to investigate brain activity associated with a local  
218 anesthetic in the form of a medical gel. Furthermore, it was made clear that only one person,  
219 i.e. the participant, would receive this medication on the right hand and complete the tasks  
220 inside the scanner, while the confederate would not receive any medication and complete the  
221 same tasks on a computer next to the scanner.

222 After signing the consent form and the MR-safety questionnaire, the confederate was  
223 asked to wait outside the control room while an individual psychophysical pain calibration  
224 was performed with the participant. This was done to determine the maximum level of  
225 tolerable pain and to specify average subjective values for very painful (rating of 7 on a scale  
226 from 0 = not painful to 8 = extremely painful), medium painful (rating of 4) and not painful, but  
227 perceivable (rating of 1) stimulation. As pain tolerances can vary depending on the body part  
228 and handedness (Murray & Safferstone, 1970; Pud et al., 2009), we calibrated each hand  
229 individually to match the stimulation intensities and subjective pain levels for each hand. The  
230 hand calibrated first was counterbalanced across participants. To this end, an electrode was  
231 attached to the dorsum of each hand using medical tape. Electrical stimulation of various  
232 strengths (stimulus duration = 500 ms) was administered using the procedure employed by  
233 Rütgen, Seidel, Silani, et al. (2015), with two rounds going from very low (0.05 mA) to  
234 continuously higher stimulation until the participant indicated the last received stimulus as an  
235 '8', after which each round was terminated. This was followed by a third round of stimuli with  
236 random intensity in the before calibrated range. Short breaks between the stimuli and longer  
237 breaks of a few minutes between the rounds ensured an independent rating of each stimulus  
238 unbiased by previous one(s). Participants were instructed to rate each stimulus as intuitively  
239 but also as accurately as possible. Input intensities for the task were the individual average  
240 ratings for painful (rating of 7) and non-painful (rating of 1) stimulation given during  
241 calibration, separately for the left and right hand. Those were  $0.64 \pm 0.67$  ( $M \pm SD$ ) mA (left  
242 hand) and  $0.53 \pm 0.36$  mA (right hand) for painful, and  $0.09 \pm 0.06$  mA (left hand) and  $0.10 \pm$   
243  $0.06$  mA (right hand) for non-painful sensations. We compared values for painful and non-

## Somatosensory empathic sharing

244 painful stimulation separately for left and right hands using two paired *t*-tests in order to  
245 investigate differences in pain tolerance between the hands (analysis not preregistered;  
246 Murray & Safferstone, 1970; Pud et al., 2009). Stimulation intensities did not differ between  
247 the two hands (pain:  $t(44) = 1.59, p = .117$ ; no pain:  $t(44) = -0.99, p = .325$ ). In general,  
248 electrical stimulation was delivered using a Digitimer DS5 Isolated Bipolar Constant Current  
249 Stimulator (Digitimer Ltd, Clinical & Biomedical Research Instruments).

250 Next, a medical student in a white lab coat posing as the study doctor introduced the  
251 medication as a “powerful local anesthetic” and gave information on its effects and possible  
252 side effects. Participants were told that the medication would be effective after a 15-20  
253 minutes waiting period and then remain stable for 2-3 hours. The study doctor attached a  
254 white paper bracelet to the right wrist of the participants (as a visual reminder which hand  
255 received the “medical treatment”), then applied and rubbed in the placebo gel on the dorsum  
256 of the right hand. On the left hand, participants were told that a control gel with no active  
257 ingredients was applied. In reality, both gels contained nearly the same basic ingredients of a  
258 standard skin gel with no active pharmacological components (see A.3 in Supplement A for  
259 exact ingredients). In matching the two gels, we aimed for clearly recognizable visual and  
260 olfactory distinction, but the same tactile feeling and hydrating properties, and adhered to  
261 previously used procedures inducing placebo analgesia with topical creams and gels (e.g.  
262 Benedetti et al., 1999; Bingel et al., 2006; Geuter et al., 2013; Schenk et al., 2014;  
263 Tinnermann et al., 2017). After the application, the participant was led outside the control  
264 room to (ostensibly) wait for the “medication” to take effect and was told that the confederate  
265 would undergo the same pain calibration in the meantime. During the waiting period, the  
266 participant was instructed regarding the pain task. After 15 minutes, the participant returned  
267 to the control room and was told that the effectiveness of the medication would now be  
268 verified using a “pain test”. Here, we employed a classic conditioning procedure to amplify  
269 the effects of the placebo. After removal of excess gel and disinfection with 70% isopropyl  
270 rubbing alcohol, one electrode was again attached to the dorsum of each hand, using the  
271 same placement as during calibration. Participants were told that they would be getting

## Somatosensory empathic sharing

272 stimulation on both hands that they had judged as “painful” before, and were asked to rate  
273 how painful it felt for them. On the left (control) hand, participants indeed received stimulation  
274 with a prior subjective rating of 7 (“very painful”), on the right (placebo) hand, however, they  
275 covertly received stimulation with a prior rating of 4 (“medium painful”) to suggest substantial  
276 pain relief by the medical gel. All participants completed at least two conditioning rounds (in  
277 the first round, three successive stimuli were given, in subsequent rounds four), and were  
278 given oral feedback after each round by the experimenter, namely that their ratings on the  
279 left/control hand were similar to their ratings during calibration, but the ratings on the  
280 right/placebo hand had decreased substantially. If participants rated the stimuli on the  
281 right/placebo hand greater than 5 and/or the stimuli on the left/control hand lower than 5, the  
282 conditioning round was deemed unsuccessful and repeated up to a maximum of four times.  
283 After unsuccessful rounds, stimuli were slightly adjusted for the next round(s) to increase the  
284 contrast between the two hands, i.e. increasing intensities for the left hand and/or decreasing  
285 intensities for the right hand. This was done without knowledge of the participants, who  
286 thought they received the same level of stimulation on both hands at all times.

287 Afterwards, the participant and the confederate were led into the scanner room and the  
288 confederate was seated on a table with a computer screen, keyboard and headphones next  
289 to the scanner. Following general adjustments, the participant completed two runs (22  
290 minutes each) of the pain task, and one run of another task (not reported here) in a fixed  
291 order. The rating hand of the participants was counterbalanced between but kept constant  
292 within participants over all tasks. Upon completion of all tasks, the experimenter went inside  
293 the scanner room pretending to get the confederate, after which the field map and structural  
294 image were acquired. After scanning, participants filled out post-experimental questionnaires.  
295 They received a compensation of 50 Euros for taking part in the whole study and an aliquot  
296 amount if they dropped out earlier. The overall scanning session took ~ 4 hours, of which  
297 participants spent around 80 minutes lying in the scanner.

## 298 2.5 Pain task

299 To induce pain, we used short-lasting painful and non-painful electrical stimulation  
300 delivered to the right and left hands of the participant or confederate in different trials. By  
301 adding a non-painful control stimulation, our effects can be more specifically attributed to  
302 pain processing. Domain-general aspects (such as generalized perceptual or behavioral  
303 responses, including stimulus-directed attention) related to stimulus presentation are  
304 explicitly eliminated by this approach (Petrovic, Kalso, Petersson, & Ingvar, 2002; Rütgen,  
305 Seidel, Silani, et al., 2015). The pain task was implemented in MATLAB R2017b (Mathworks)  
306 using the Cogent 2000 Toolbox Version 1.33 ([http://www.vislab.ucl.ac.uk/cogent\\_2000.php](http://www.vislab.ucl.ac.uk/cogent_2000.php)).  
307 Participants saw either pictures of their own hands (with the right/placebo hand wearing a  
308 white bracelet) or the confederate's hands from an egocentric perspective on black  
309 background, depending on who would receive the next stimulation (see Figure 1 and A.4 in  
310 Supplement A).

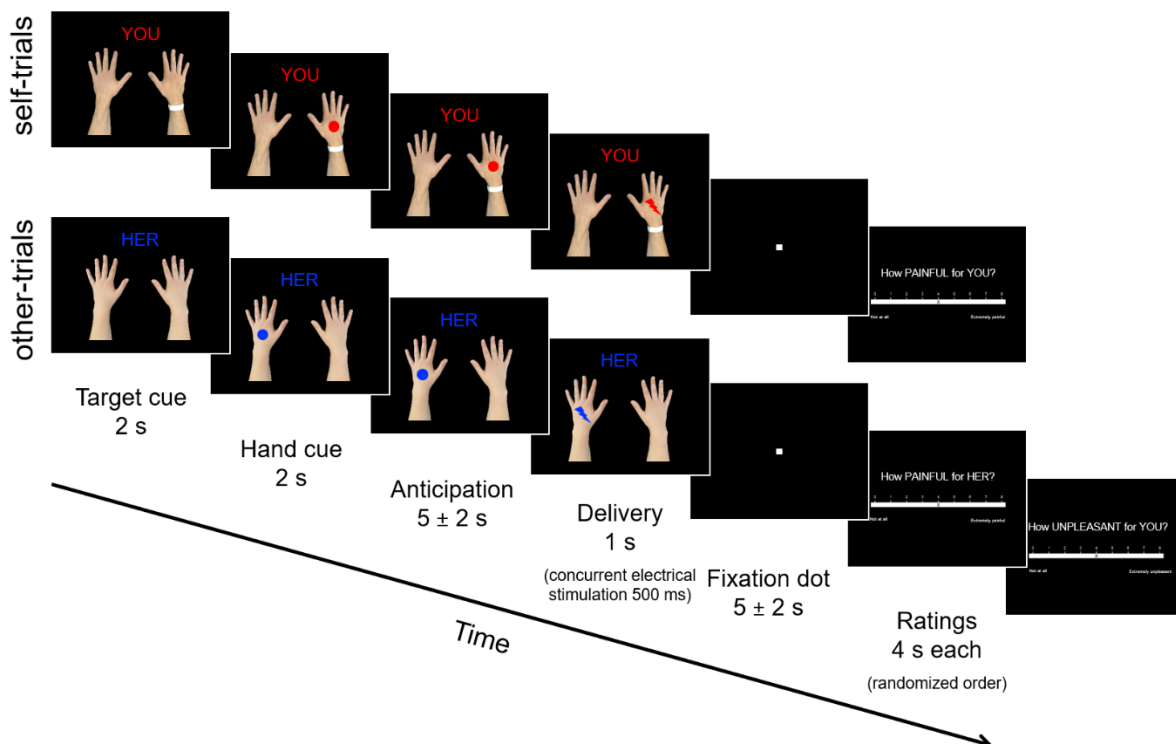

*Figure 1.* Overview of the pain task. As part of a 2x2x2 full-factorial design, participants either received painful (red icons) or non-painful (blue icons) electrical stimulation themselves (seeing their own hands; self-trials) or witnessed a second person receiving such stimulation (seeing the confederate's hands; other-trials). Prior to the task, all participants had undergone a localized placebo analgesia induction on their right hand, while the left hand acted as each participant's individual control. In half of all trials, subjective ratings were collected after stimulus delivery for self- and other-related pain intensity, as well as self-related unpleasantness when observing the other person in pain.

## Somatosensory empathic sharing

311 Each trial began with the written German words “DU” (“YOU”, self-trials) or “SIE” (“HER”,  
312 other-trials) in either red or blue (for painful or non-painful stimulation, respectively),  
313 indicating the target and the intensity of the next stimulation (target cue; 2000 ms). Then, a  
314 circle icon in the same color of the word was shown on the hand receiving the next  
315 stimulation (hand cue; 2000 ms). After a jittered anticipation period ( $5000 \pm 2000$  ms, evenly  
316 distributed in 500 ms steps) simultaneously displaying the hands with the two cues, the circle  
317 changed into a lightning icon of the same color, indicating stimulus delivery (duration of  
318 electrical stimulus = 500 ms, display of delivery cue = 1000 ms). This was followed by a  
319 jittered waiting period ( $5000 \pm 2000$  ms, evenly distributed in 500 ms steps), depicting a white  
320 dot on black background. In half of all trials, stimulation delivery was followed by a rating  
321 period (4000 ms per question; appearance of the rating phase was determined by four  
322 pseudorandomized sequences previously created). During self-trials, participants were asked  
323 how painful the stimulus had felt for them. During other-trials, participants were asked two  
324 questions tapping into different aspects of empathy (Coll et al., 2017; Lamm & Majdandžić,  
325 2015), namely (1) how painful the stimulus was for the other person (cognitive-evaluative  
326 aspect) and (2) how unpleasant it was for the participant him- or herself to witness the other  
327 person receiving such stimulation (affective-sharing aspect). The two empathy questions  
328 always appeared in a random order. Questions were rated on visual analogue scales from 0  
329 = “not perceivable at all” to 8 = “extremely painful/unpleasant”. A 2000 ms inter-trial-interval  
330 screen depicting a white dot on black background was shown before the start of the next  
331 trial. Participants completed 128 trials with an average duration of 21/25 s (self-trials/other-  
332 trials) per trial, 64 trials per run and 16 trials per condition, with trials appearing in one out of  
333 four pseudorandom orders previously created.

### 334 **2.6 MRI data acquisition**

335 MRI data was acquired using a 3 Tesla Siemens Magnetom Skyra MRI-system (Siemens  
336 Medical, Erlangen, Germany), equipped with a 32-channel head coil. The functional scanning  
337 sequence included the following parameters: Echo time (TE)/repetition time (TR) = 34/1200  
338 ms, multi-band acceleration factor = 4, flip angle =  $66^\circ$ , interleaved multi-slice mode,

339 interleaved acquisition, field of view = 210 mm, matrix size = 96x96, voxel size = 2.2x2.2x2.0  
 340 mm<sup>3</sup>, 52 axial slices of the whole brain coplanar the connecting line between anterior and  
 341 posterior commissure, and slice thickness = 2 mm. Functional volumes were acquired in two  
 342 runs (and one run for another task), with small breaks in between the three runs. Structural  
 343 images were acquired using a magnetization-prepared rapid gradient-echo sequence (TE/TR  
 344 = 2.43/2300 ms, ascending acquisition, field of view = 240 mm, single shot multi-slice mode,  
 345 208 sagittal slices, voxel size = 0.8x0.8x0.8 mm<sup>3</sup>, flip angle = 8°, slice thickness = 0.8 mm).

## 346 2.7 Behavioral data analysis

347 The analysis workflow of the behavioral and fMRI data is summarized in Figure 2 and  
 348 referred to throughout the following methods and results. Statistical analyses were performed  
 349 in RStudio Version 3.6.1 (R Core Team, 2019; for analysis and plotting functions see A.5 in  
 350 Supplement A). We conducted all our preregistered *t*-tests one-tailed due to a *priori*  
 351 directional hypotheses.

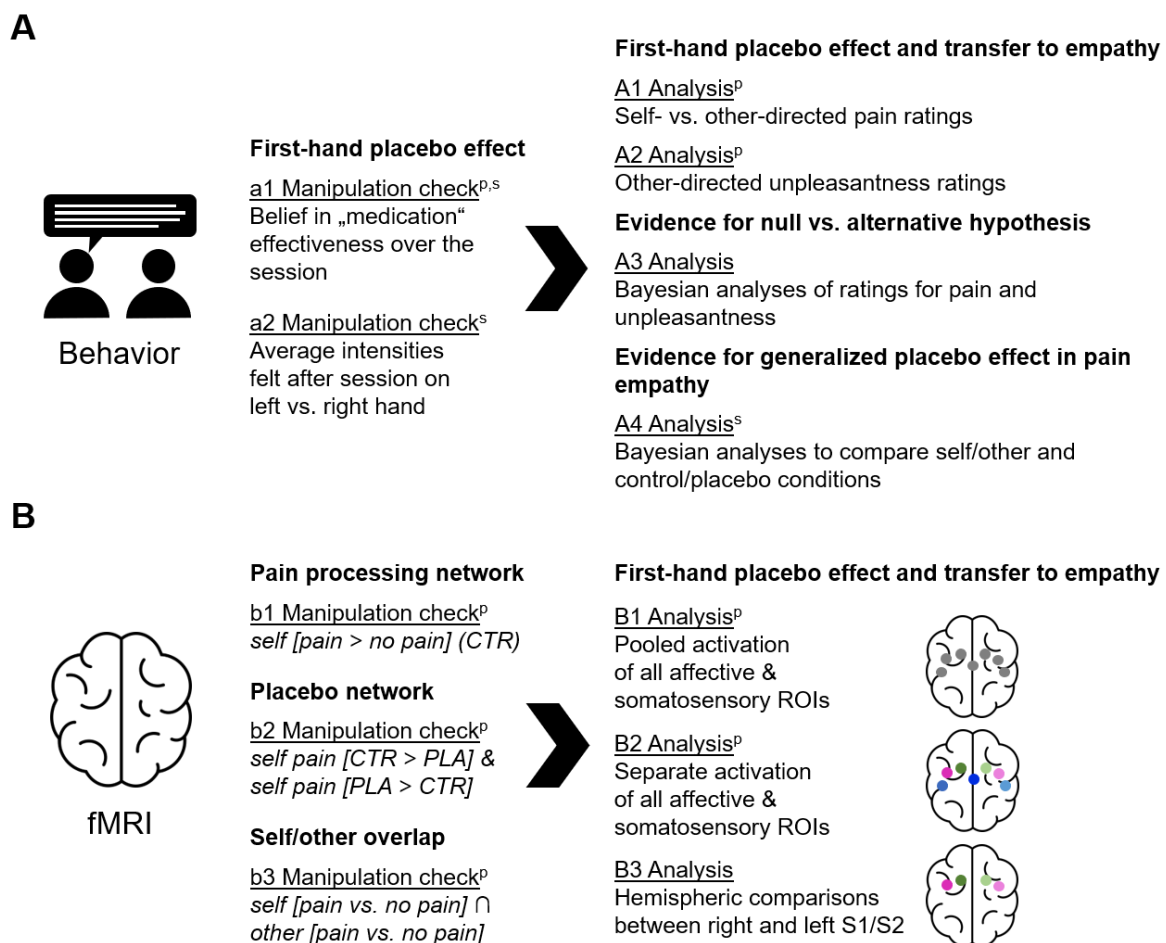

Figure 2. Overview of the analysis workflow. A) For the behavioral data, we explored the validity of our design using two manipulation checks (a1+a2; reported in A.6 in Supplement A). Then, we

conducted four analyses to evaluate the evidence for a first-hand localized placebo analgesia effect and a transfer of this effect to empathy using the ratings collected from the task (A1-A4; A4 is reported in Supplement B). B) Regarding the fMRI data, we used three manipulation checks to establish the validity of our pain task (b1), the typical placebo analgesia network (b2) and the previously reported self-other overlap in brain activity related to first-hand and empathy for pain (b3). For our main analyses, we employed a region of interest (ROI) approach to evaluate the evidence for a first-hand localized placebo analgesia effect and a transfer of this effect to empathy in seven ROIs: anterior midcingulate cortex, bilateral anterior insula, as well as bilateral primary (S1) and secondary somatosensory cortex (S2). This was first done using pooled activation of all ROIs (B1) and then analyzing each ROI separately (B2). Finally, we gathered further evidence for a first-hand localized placebo effect and absence of a transfer to empathy using a hemispheric comparison analysis (B3). Preregistered analyses are marked with <sup>p</sup>, analyses in the supplement are marked with <sup>s</sup>; PLA = placebo; CTR = control.

### 352 **2.7.1 Preregistered analyses**

353 We implemented a within-subjects, full-factorial design with three factors of two levels  
354 each (*treatment*: placebo vs. control hand, *target*: self vs. other, *intensity*: pain vs. no pain).  
355 Two parametric repeated-measures analyses of variance (ANOVAs) were used to analyze  
356 the results. In the first ANOVA (analysis A1 in Figure 2), the dependent variable was the self-  
357 and other-related pain ratings. A second ANOVA (analysis A2 in Figure 2) included the  
358 unpleasantness ratings as the dependent variable (omitting the factor *target*, as  
359 unpleasantness ratings were only collected in the empathy condition). For each ANOVA, we  
360 then computed planned comparisons using paired *t*-tests.

### 361 **2.7.2 Post hoc analyses**

362 Due to the unexpected “null” finding of no transfer of the first-hand placebo effect to  
363 empathy, we aimed to gather further relative evidence for the null vs. the alternative  
364 hypothesis, using a Bayesian approach (e.g. Wagenmakers et al., 2018). This was realized  
365 with three Bayesian paired *t*-tests (analysis A3 in Figure 2) mirroring the above preregistered  
366 analyses. We used a standard Cauchy (0,1) prior as the effect size (indicating a 50% chance  
367 to observe an effect size between -1 and 1; e.g. Rouder et al., 2009). Note that Bayesian *t*-  
368 tests produce a Bayes Factor comparing the relative evidence between the alternative and  
369 null hypothesis ( $BF_{10}$ ,  $H_1$  vs.  $H_0$ ; Giolla & Ly, 2019). In interpreting these values, a  $BF_{10} < 3$   
370 has been suggested to indicate weak evidence, a  $BF_{10} > 3$  positive evidence, and  $BF_{10} > 150$   
371 very strong evidence for the alternative hypothesis (Jarosz & Wiley, 2014). Evidence for the  
372 null compared to the alternative hypothesis ( $BF_{01}$ ,  $H_0$  vs.  $H_1$ ) was computed as  $BF_{01} = 1/BF_{10}$ .  
373 For an additional analysis exploring the existence of any placebo-related downregulatory  
374 effect (analysis A4 in Figure 2) as well as results and discussion, see Supplement B.



## 375 **2.8 fMRI data preprocessing and analysis**

### 376 **2.8.1 Preprocessing and first-level analysis**

377 To preprocess and statistically analyze the fMRI data, the software Statistical Parametric  
378 Mapping (SPM12, <https://www.fil.ion.ucl.ac.uk/spm/software/spm12/>, Wellcome Trust Centre  
379 for Neuroimaging) running on MATLAB Version R2015b (Mathworks) was used. All brain  
380 regions were labelled with the SPM Anatomy toolbox version 2.15 (Eickhoff et al., 2005).  
381 Preprocessing of the functional volumes included slice timing (reference = middle slice;  
382 Sladky et al., 2011), realignment with the participant-specific fieldmap, coregistration of  
383 structural and functional images, segmentation into gray matter, white matter (WM) and  
384 cerebrospinal fluid (CSF) tissues, spatial normalization, and spatial smoothing by convolution  
385 with an 8 mm full-width at half-maximum (FWHM) Gaussian Kernel. The first-level design  
386 matrix of each participant contained eight regressors for anticipation (combining target +  
387 hand cues), eight for delivery and one for all rating phases, leading to 17 regressors. The  
388 different conditions were modeled in an event-related fashion and convolved with SPM12's  
389 standard canonical hemodynamic response function. Additional nuisance regressors  
390 included six realignment parameters and two regressors modeling WM and CSF for each of  
391 the runs (the latter two were extracted using the REX toolbox; Duff, Cunnington, & Egan,  
392 2007). We excluded 1-2 trials in four participants from analysis post hoc due to technical  
393 malfunctioning of the pain stimulator (e.g. missing stimulation in a pain trial).

### 394 **2.8.2 Manipulation checks**

395 We preregistered three manipulation checks testing (i) the validity of our design, (ii) the  
396 success of the placebo analgesia induction and (iii) the existence of overlapping activation  
397 for first-hand and empathy for pain (manipulation checks b1-b3 in Figure 2). To this end,  
398 eight contrast images were created for each participant (these were not specified in the  
399 preregistration, but we adhered to the procedure used in our previous study, modeling the  
400 whole time phase from the first cue and anticipation phase until one second after delivery  
401 onset; Rütgen, Seidel, Silani, et al., 2015). We then calculated a full factorial model within a  
402 flexible factorial framework in SPM12 using the within-subjects factors *treatment* (placebo vs.  
403 control hand) and *condition* (combining the factors *target* (self, other) and *intensity* (pain, no

404 pain)), as well as the between-subjects factor *subject*. We determined significance using  
405 cluster-level inference. To correct for multiple comparisons, we calculated the cluster extent  
406 threshold by means of “CorrClusTh.m”, an SPM extension script (Thomas Nichols, University  
407 of Warwick, United Kingdom & Marko Wilke, University of Tübingen, Germany;  
408 <http://www2.warwick.ac.uk/fac/sci/statistics/staff/academicresearch/nichols/scripts/spm/>).

409 First, we used the contrast [*self - pain* > *self - no pain*] of the control hand to evaluate  
410 whether our design robustly activated brain areas associated with pain processing as in  
411 previous studies (manipulation check b1 in Figure 2). This check is reported at a cluster  
412 probability of  $p < .05$  (familywise-error (FWE)-corrected cluster-forming threshold of  $k = 188$ ,  
413 initial cluster-defining threshold  $p < .001$  uncorrected).

414 Second, we aimed at showing that the placebo analgesia induction activated a  
415 widespread network previously identified in placebo analgesia studies (manipulation check  
416 b2 in Figure 2; see e.g. Atlas & Wager, 2012 for a summary). Here we used small volume  
417 correction (SVC), with a threshold of  $p < .05$  FWE-corrected at peak-level, on the contrasts  
418 [*self - placebo hand* > *self - control hand*] and [*self - control hand* > *self - placebo hand*],  
419 using only the pain conditions (initial threshold:  $p < .001$  uncorrected). This approach was  
420 directly motivated by previous studies (e.g. Bingel et al., 2007; Eippert et al., 2009; Geuter et  
421 al., 2013; Wager et al., 2011; Zubieta et al., 2005) and chosen to maximize sensitivity of the  
422 analyses. In accordance with these studies, we analysed spheres around MNI coordinates  
423 used in the study by Rütgen, Seidel, Silani, et al. (2015), as this study’s overall design  
424 closely matched the present one, and as this allowed us to compare data from within the lab  
425 ( $[\pm x, y, z]$ ; size of sphere): Dorso-lateral prefrontal cortex (DLPFC;  $[\pm 36, 13, 39]$ ; 15 mm), S2  
426 ( $[\pm 39, -15, 18]$ ; 10 mm), insula (anterior  $[\pm 33, 18, 6]$  and posterior  $[\pm 44, -15, 4]$  part; both 10  
427 mm), dorsal (dACC;  $[\pm 3, 6, 36]$ ; 10 mm) and rostral ACC (rACC; pregenual  $[\pm 10, 32, -8]$  and  
428 subgenual  $[\pm 6, 30, -9]$  parts; both 10 mm), ventral striatum ( $[\pm 9, 6, -3]$ ; 6 mm), thalamus  
429 ( $[\pm 12, -18, 3]$ ; 6 mm), and periaqueductal gray ( $[0, -32, -10]$ ; 6 mm).

430 Thirdly, to check that the design evoked empathic responses that overlapped with the  
431 first-hand experience of pain, we performed a conjunction analysis between self- and other-

432 related conditions using the contrast [*self - pain* > *self - no pain*]  $\cap$  [*other - pain* > *other - no*  
433 *pain*] for the control hand only (manipulation check b3 in Figure 2). However, this  
434 preregistered check did not reveal any significant clusters, when using a whole brain and  
435 FWE-cluster-corrected approach. The following checks were therefore added post hoc: To  
436 investigate this overlap in previously reported affective brain regions related to empathy, we  
437 adopted a SVC approach on three ROIs from an independent meta-analysis using the above  
438 two contrasts (Lamm et al., 2011): left AI [-40, 22, 0], right AI [39, 23, -4] and aMCC [-2, 23,  
439 40] (all 10 mm), again  $p < .05$  FWE-corrected at peak-level. Furthermore, to maximize  
440 sensitivity and detect any overlap between self- and empathy-related conditions, we  
441 additionally reported the same conjunction with contrasts averaging over both hands.

### 442 **2.8.3 Preregistered analyses**

443 To test our hypothesis of a somatosensory-specific transfer of placebo analgesia to  
444 empathy for pain, we conducted ROI analyses in bilateral AI and aMCC (see coordinates  
445 above taken from Lamm et al., 2011), as well as in bilateral S1 and S2 (left S1:  
446 [-39, -30, 51]; right S1: [36, -36, 48]; left S2: [-39, -15, 18]; right S2 [39, -15, 18]; see Figure  
447 3). S1/S2 coordinates were taken from independent findings investigating first-hand  
448 somatosensory pain perception (Bingel et al., 2004 for S1, 2007 for S2). We created 10 mm  
449 spheres around each coordinate with MarsBaR (Brett et al., 2002) and then extracted  
450 parameter estimates for each ROI from the first-level contrast images of each participant and  
451 for each condition using REX (Duff et al., 2007). The specific coordinates and sphere sizes  
452 for the ROI analyses were not preregistered, but we again adhered to procedures used in  
453 Rütgen, Seidel, Silani, et al. (2015). ROI analyses were conducted in RStudio Version 3.6.1  
454 (R Core Team, 2019). Mimicking the behavioral analysis, we implemented the same within-  
455 subjects, full-factorial design with three factors (*treatment*, *target*, *intensity*) of two levels  
456 each, and the additional factor *ROI* with seven levels (pooled activation of lAI, rAI, aMCC,  
457 lS1, rS1, lS2, and rS2; analysis B1 in Figure 2). In the pooled ANOVA, Mauchly's test for  
458 sphericity was significant for the main effect of ROI and all interactions with the factor ROI,  
459 which is why those results are reported using Greenhouse Geisser sphericity correction. Due

460 to the significant main effect of ROI and interactions with the factor ROI in the initial four-way  
461 ANOVA, we proceeded with our preregistered analysis plan by computing separate ANOVAs  
462 and planned comparisons for each of the ROIs (analysis B2 in Figure 2). Again, all  
463 preregistered *t*-tests were conducted one-tailed.

## A

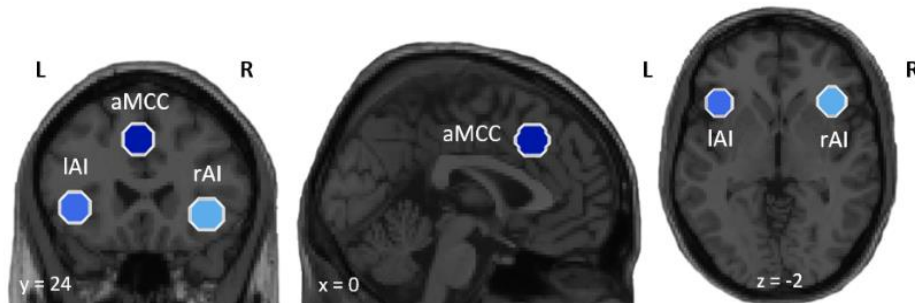

## B

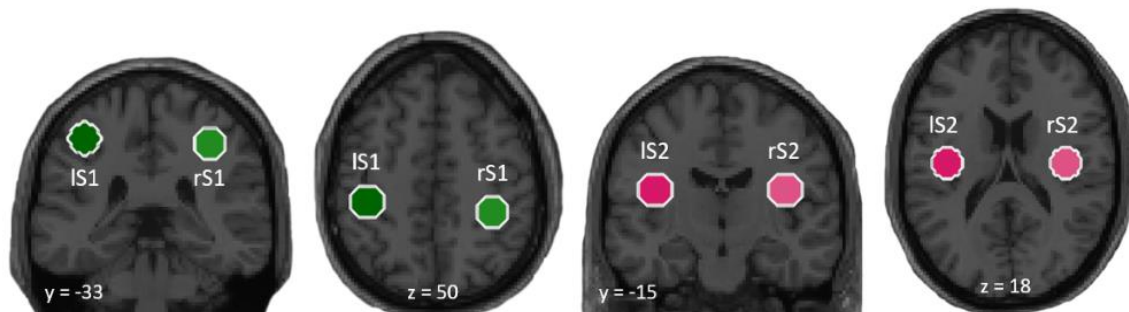

*Figure 3. Overview of the seven regions of interest (ROIs) used in the main analysis. We analysed the transfer of the first-hand placebo effect to empathy for pain in A) three affective and B) four somatosensory brain regions (all 10 mm spheres; MNI coordinates [x, y, z]: left/right anterior insula (lAI: [-40, 22, 0]; rAI: [39, 23, -4]), anterior midcingulate cortex (aMCC: [-2, 23, 40]), left/right primary somatosensory cortex (lS1: [-39, -30, 51]; rS1: [36, -36, 48]); left/right secondary somatosensory cortex (lS2: [-39, -15, 18]; rS2: [39, -15, 18]); anatomical brain regions were confirmed with the SPM Anatomy toolbox version 2.15 by Eickhoff et al., 2005). Bilateral AI and aMCC coordinates were taken from an independent meta-analysis on networks involved in (empathic) pain (Lamm et al., 2011), while bilateral S1/S2 coordinates were taken from two studies investigating somatosensory pain perception (Bingel et al., 2004 for S1, 2007 for S2). L = left hemisphere, R = right hemisphere.*

### 464 2.8.4 Post hoc analyses

465 Our preregistered main analysis tested for the difference between placebo and control  
466 hand in each ROI, e.g. activation differences in right S1 during stimulation of left  
467 (contralateral) control hand vs. right (ipsilateral) placebo hand. However, although stimulation  
468 of one body site often evokes bilateral activation, most studies investigating somatosensation  
469 of noxious and non-noxious stimuli report a strong contralateral bias, i.e. a location coding in  
470 the contralateral hemisphere for S1 and S2 (Bingel et al., 2003; Bingel et al., 2004; Ogino et  
471 al., 2005; Tamè et al., 2012; Wager et al., 2004). Thus, our preregistered analysis approach  
472 was not optimized to deal with possible laterality issues in these two regions. Therefore, to  
473 gather additional evidence that our participants had in fact a first-hand placebo analgesia

## Somatosensory empathic sharing

474 effect that was localized, or in other words, specific for the right hand (and to ensure that this  
475 effect did in fact not transfer to empathy), we conducted a hemispheric comparison (analysis  
476 B3 in Figure 2) aimed at directly contrasting brain activation in the corresponding  
477 contralateral hemispheres related to each hand (e.g. activation in right S1 during stimulation  
478 of left control hand vs. activation in left S1 during stimulation of the right placebo hand).  
479 Mirroring previous approaches, we used the pain conditions only (e.g. Eippert et al., 2009;  
480 Rütgen, Seidel, Silani, et al., 2015; Zubieta et al., 2005). We focused this analysis on S1 and  
481 S2, since both have been found to provide spatial information of painful and non-painful  
482 stimulation in the hemisphere contralateral to the stimulated body side (Bingel et al., 2003).  
483 However, while S1 is more often reported in relation to general stimulation (Keysers et al.,  
484 2004; Ploner et al., 2000), S2 additionally seems to encode stimulus intensity and play a  
485 greater role in the processing of pain (Lockwood et al., 2013). Furthermore, involvement of  
486 S2 in placebo analgesia mechanisms has been reported, making S2 an especially optimal  
487 candidate for testing the localized first-hand placebo analgesia effect in our study (Bingel et  
488 al., 2003, 2007; Bingel et al., 2004; Eippert et al., 2009; Geuter et al., 2013; Price, Craggs,  
489 Nicholas Verne, Perlstein, & Robinson, 2007; Schenk et al., 2014; Wager et al., 2011, 2004).  
490 Our aim for this analysis was thus to directly compare the two hemispheres of both regions  
491 with each other, but only considering activation related to each contralateral hand. To this  
492 end, we used the previously extracted parameter estimates of left and right S1 and S2. For  
493 each region and hemisphere, we subtracted activation related to the ipsilateral hand from  
494 activation related to the contralateral hand (e.g. right S1 = activation related to left control  
495 hand stimulation - activation related to right placebo hand; left S1 = activation related to right  
496 placebo hand - activation related to left control hand). Then, we used these subtracted  
497 values to compare activation in left S1 related only to the right placebo hand with activation in  
498 right S1 related only to the left control hand (and the same for S2) via two-tailed paired *t*-  
499 tests. This was done separately for self- and other-related stimulation.

## 500 **3 Results**

### 501 **3.1 Behavioral results**

502 The two manipulation checks showed a strong belief in the effectiveness of the placebo  
503 gel over the course of the session and a robust behavioral placebo effect even afterwards  
504 (manipulation checks a1 and a2 in Figure 2; see A.6 and Figure A1 in Supplement A).

505 -- Insert Inline Supplementary Figure A1 here --

#### 506 **3.1.1 Preregistered analyses**

507 To evaluate the existence of a localized first-hand placebo analgesia effect for pain as  
508 well as the transfer of this effect to other-related pain and self-experienced unpleasantness,  
509 we calculated two repeated-measures ANOVAs. The first ANOVA using self- and other-  
510 related pain ratings revealed all main effects and interactions to be significant (analysis A1 in  
511 Figure 2; see Table A1 in Supplement A and Figure 4 for an overview of all behavioral  
512 ratings). Planned comparisons showed a significant placebo analgesia response for self-  
513 related but not for other-related stimulation (self:  $t(44) = 9.49$ ,  $p < .001$  one-tailed,  $M_{diff} =$   
514  $1.619$ , 95%  $CI_{meandiff} [1.28, 1.96]$ , Cohen's  $d_z = 1.42$ ; other:  $t(44) = -0.17$ ,  $p = .435$  one-tailed,  
515  $M_{diff} = 0.018$ , 95%  $CI_{meandiff} [-0.23, 0.19]$ , Cohen's  $d_z = 0.03$ ). Indeed, the mean ratings were  
516 decreased in the placebo compared to the control hand for first-hand stimulation (see Figure  
517 4). This was not the case for pain empathy, where the mean ratings for the two hands were  
518 similar. The magnitude of the placebo effect, i.e. the difference between placebo and control  
519 hand, was significantly higher in the self, compared to the other (self vs. other:  $t(44) = -8.22$ ,  
520  $p < .001$  one-tailed,  $M_{diff} = -1.64$ , 95%  $CI_{meandiff} [-2.04, -1.24]$ , Cohen's  $d_z = 1.23$ ).

521 -- Insert Inline Supplementary Table A1 and A2 here --

522 The second ANOVA, using ratings of the participants' own unpleasantness while watching  
523 the confederate receiving stimulation, showed similar results, with a main effect of intensity  
524 but no hand x intensity interaction (analysis A2 in Figure 2; see Table A2 in Supplement A).  
525 The planned comparison indicated no placebo analgesia effect related to one's own  
526 unpleasantness ( $t(44) = 0.69$ ,  $p = .245$  one-tailed,  $M_{diff} = 0.084$ , 95%  $CI_{meandiff} [-0.16, 0.33]$ ,  
527 Cohen's  $d_z = 0.10$ ). Participants experienced a similar amount of unpleasant affect when

528 witnessing the other's pain on either hand. In other words, there was no transfer of the first-  
529 hand placebo analgesia effect, neither to empathy for pain nor to one's own unpleasantness.

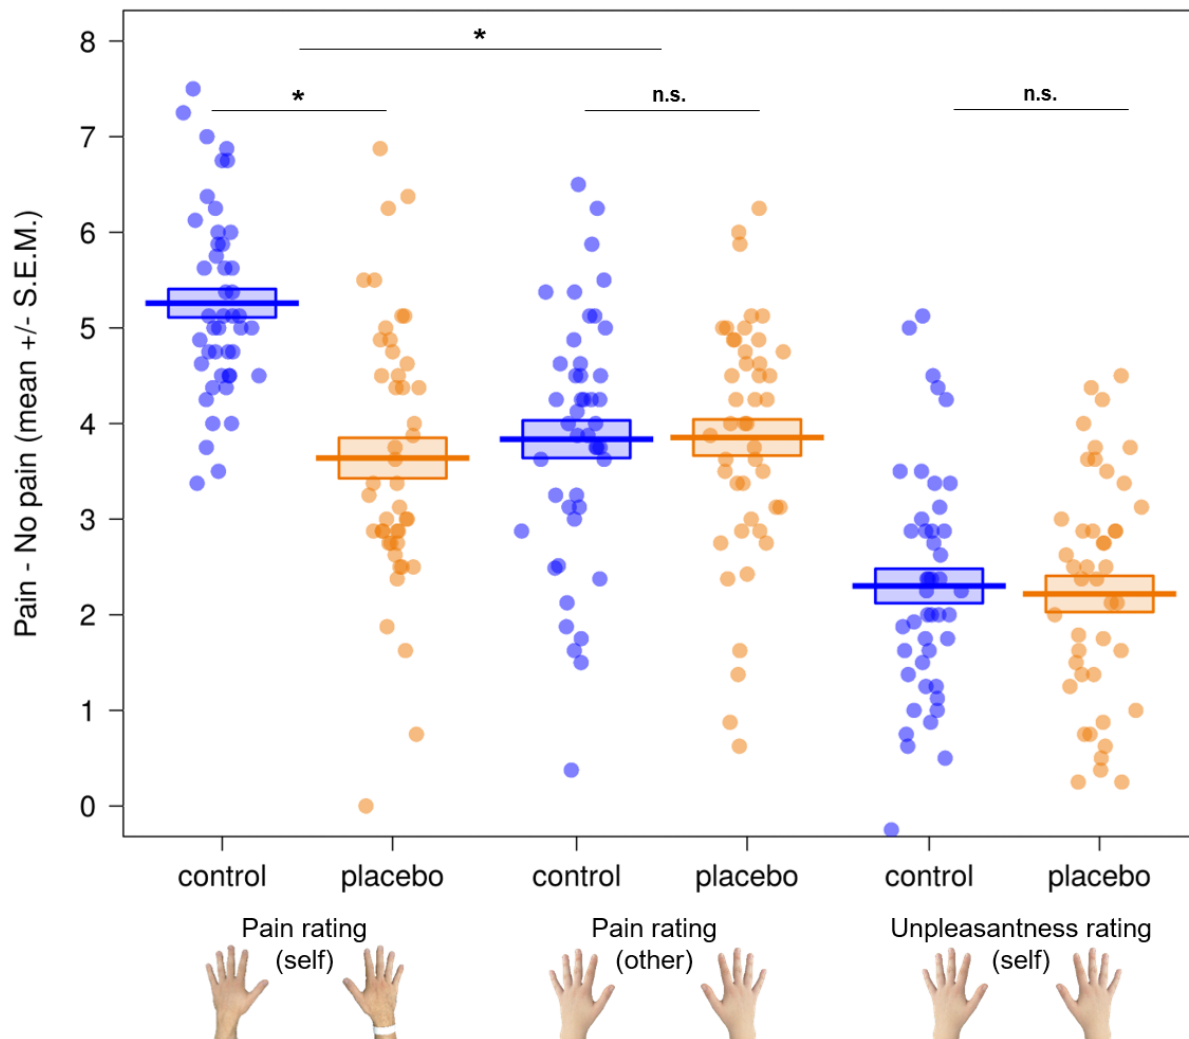

Figure 4. Behavioral results of the pain task. Participants rated electrical stimulation they either received themselves or witnessed another person receiving (displayed here as an index of the ratings for pain - no pain conditions). Using paired  $t$ -tests, we observed a significant placebo effect for self-related pain ratings, but no transfer to other-related pain or self-experienced unpleasantness ratings when observing the other in pain. \*  $p < .05$ ; n.s. = not significant; S.E.M. = standard error of the mean.

### 530 3.1.2 Post hoc analyses

531 Complementing the above results, the Bayesian paired  $t$ -tests using self- and other-  
532 related pain as well as unpleasantness ratings showed very strong evidence for a placebo  
533 analgesia effect in first-hand pain ( $BF_{10} = 3.15 \times 10^9$ ), but strong evidence against such an  
534 effect in pain empathy (analysis A3 in Figure 2). The latter was visible in the other-related  
535 pain ratings where the null hypothesis was found to be approximately eight times more likely  
536 than the alternative hypothesis in our sample ( $BF_{01} = 8.47$ ). For unpleasantness ratings, the  
537 null hypothesis was found to be approximately seven times more likely than the alternative

538 hypothesis ( $BF_{01} = 6.80$ ). In sum, the behavioral results suggested a strong placebo  
539 analgesia effect for self-related pain, localized to participants' right hands, but no transfer of  
540 this effect to other-related pain or self-experienced unpleasantness.

## 541 **3.2 fMRI results**

### 542 **3.2.1 Manipulation checks**

543 We conducted preregistered three manipulation checks to evaluate the (i) validity of our  
544 design, (ii) success of the first-hand placebo analgesia induction and (iii) existence of  
545 overlapping activation for self- and other-related pain (see Figure 5).

546 For check (i), the contrast [*self - pain* > *self - no pain*] for the control hand revealed  
547 increased hemodynamic activity in three major clusters encompassing, among others, ACC,  
548 MCC, bilateral insula, bilateral S2, thalamus and cerebellum (manipulation check b1 in  
549 Figure 2; see A.7 and Table A3 in Supplement A) whole brain,  $p < .05$  FWE-corrected at  
550 cluster level). These results showed that typical sensory-discriminative and affective-  
551 motivational areas of first-hand pain processing were activated by our task.

552 -- Insert Inline Supplementary Table A3 here --

553 For check (ii), we evaluated the contrasts [*self - pain - control hand* > *self - pain - placebo*  
554 *hand*] and [*self - pain - placebo hand* > *self - pain - control hand*] (manipulation check b2 in  
555 Figure 2; see A.7 and Table A4 in Supplement A; SVC,  $p < .05$  FWE-corrected at peak-  
556 level). We found increased hemodynamic activity in right S2, right posterior insula, bilateral  
557 dACC, bilateral AI and thalamus when participants received painful stimulation on the left  
558 control compared to the right placebo hand. In the opposite contrast, we observed increased  
559 activity in right DLPFC and left S2 for the right placebo compared to the left control hand. As  
560 whole brain results of these two contrasts encompassed multiple additional regions, these  
561 results are reported in Table A5 in Supplement A.

562 -- Insert Inline Supplementary Tables A4 and A5 here --

563 For check (iii), the conjunction [*(self pain* > *self no pain*)  $\cap$  (*other pain* > *other no pain*)]  
564 using contrasts of the control hand revealed increased activation in left AI (manipulation  
565 check b3 in Figure 2; SVC,  $p < .05$  FWE-corrected at peak-level). When averaging over both  
566 hands, we observed increased hemodynamic activity in bilateral AI and aMCC.



## Somatosensory empathic sharing

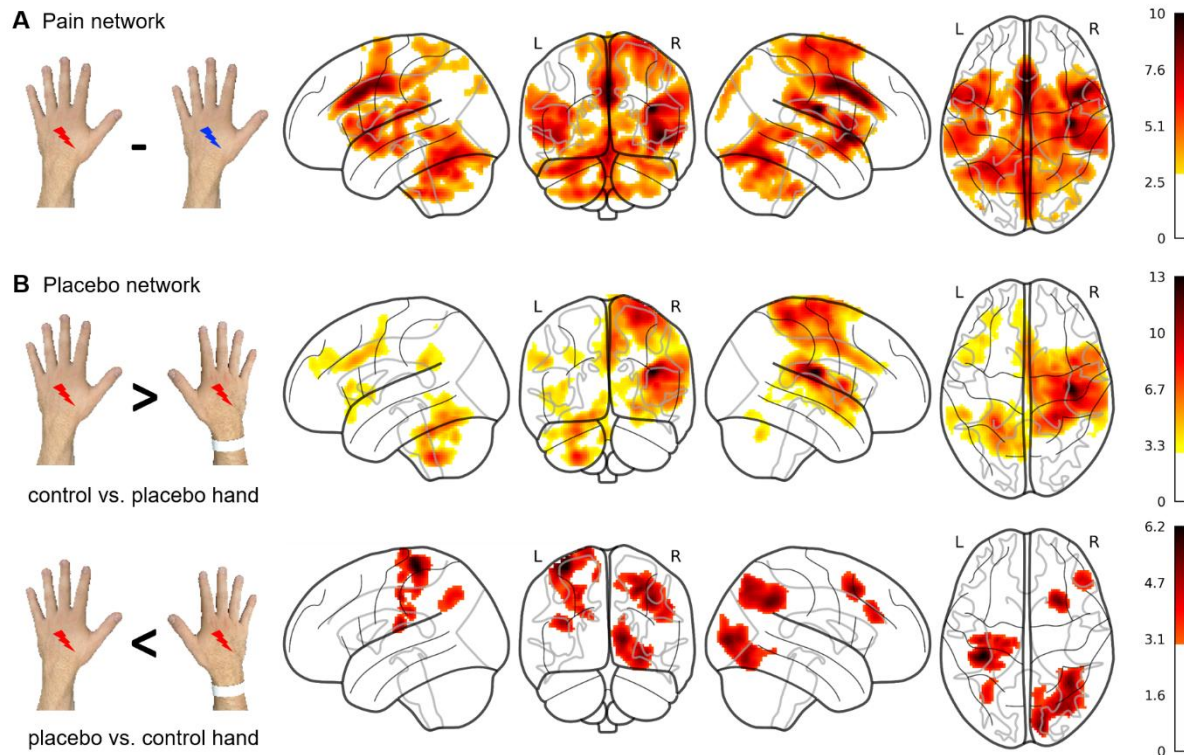

**Figure 5.** Preregistered manipulation checks of the fMRI data (see also Figure 2). A) Check b1 aimed at showing the first-hand pain processing network induced by electrical stimulation and is displayed as the contrast [*self - pain* (red icon) > *self - no pain* (blue icon)] for the control hand only. Here, we observed increased activity in both affective-motivational and sensory-discriminative pain processing regions. B) Check b2 aimed at evaluating the existence of a placebo analgesia network and is displayed using the contrasts [*self - pain - control hand* > *self - pain - placebo hand*] and [*self - pain - placebo hand* > *self - pain - control hand*] (results of this check are reported in the text using small volume correction (SVC) on specific regions). There, we observed the typical placebo network and initial evidence for a first-hand localized placebo effect. Check b3 was done using SVC and is therefore not displayed in here but used the conjunction [*self - pain* > *self - no pain*]  $\cap$  [*other - pain* > *other - no pain*]. This revealed increased activation in left AI when using only the control hand, and bilateral AI as well as aMCC when averaging over both hands. All statistical activation maps in the figure are displayed whole brain, FWE-corrected at  $p < .05$  cluster correction ( $k = 188$ ) and an initial cluster-forming threshold of  $p < .001$  uncorrected. L = left hemisphere; R = right hemisphere.

### 567 3.2.2 Preregistered analyses

568 After having verified the overall validity and effectiveness of the experimental paradigm as  
 569 well as the placebo induction procedures, we went on to test our main hypothesis for a  
 570 transfer of the first-hand placebo analgesia effect to empathy for pain using a ROI approach  
 571 (see Table 1 for an overview of all paired *t*-tests). To this end, we extracted parameter  
 572 estimates of three affective (bilateral AI, aMCC) and four somatosensory ROIs (bilateral S1  
 573 and S2). We first calculated an ANOVA pooling the activation of all seven ROIs and then  
 574 calculated separate ANOVAs and planned comparisons for each ROI to evaluate the first-  
 575 hand placebo effect, its transfer to pain empathy, and to compare the effects for self- and  
 576 other-related stimulation.

Somatosensory empathic sharing

Table 1

Main ROI analyses testing for self- and other-related placebo effects in affective and somatosensory brain regions, as well as for differences between self- and other-related effects via paired *t*-tests.

|           |             | self          |                             |                      | other         |          |                      | self vs. other |                         |                      |
|-----------|-------------|---------------|-----------------------------|----------------------|---------------|----------|----------------------|----------------|-------------------------|----------------------|
|           |             | <i>t</i> (44) | <i>p</i>                    | <i>d<sub>z</sub></i> | <i>t</i> (44) | <i>p</i> | <i>d<sub>z</sub></i> | <i>t</i> (44)  | <i>p</i>                | <i>d<sub>z</sub></i> |
| <b>B1</b> | pooled ROIs | 0.66          | .256                        | 0.09                 | 0.23          | .409     | 0.03                 | -0.27          | .394                    | -0.04                |
| <b>B2</b> | left AI     | 1.60          | <b>.059<sup>†</sup></b>     | 0.24                 | 0.67          | .254     | 0.10                 | -0.63          | .267                    | 0.09                 |
|           | right AI    | 0.41          | .341                        | 0.06                 | -0.54         | .298     | 0.08                 | -0.57          | .285                    | 0.09                 |
|           | aMCC        | -0.07         | .473                        | 0.01                 | 0.41          | .341     | 0.06                 | 0.32           | .376                    | 0.05                 |
|           | left S1     | -0.20         | .423                        | 0.03                 | 0.42          | .338     | 0.06                 | 0.39           | .349                    | 0.06                 |
|           | right S1    | 0.28          | .391                        | 0.04                 | 0.35          | .366     | 0.05                 | 0.04           | .483                    | 0.006                |
|           | left S2     | -1.87         | <b>.034<sup>*</sup></b>     | 0.28                 | -0.95         | .174     | 0.14                 | 0.57           | .285                    | 0.09                 |
|           | right S2    | 3.27          | <b>.001<sup>*</sup></b>     | 0.49                 | 0.37          | .355     | 0.06                 | -1.87          | <b>.034<sup>*</sup></b> | 0.28                 |
| <b>B3</b> | IS1 vs. rS1 | 0.88          | .385                        | 0.13                 | -0.74         | .465     | 0.11                 | 1.07           | .292                    | 0.16                 |
|           | IS2 vs. rS2 | -4.30         | <b>&lt;.001<sup>*</sup></b> | 0.64                 | -0.75         | .455     | 0.11                 | -2.85          | <b>.006<sup>*</sup></b> | 0.42                 |

Note. Planned comparisons for the region of interest (ROI) analyses (analyses B1 and B2 in Figure 2) to evaluate the first-hand placebo effect (self), its transfer to pain empathy (other) and to compare the effects for self- and other-related stimulation (self vs. other). Furthermore, analysis B3 (here and in Figure 2) directly compared activity in right vs. left S1, and right vs. left S2, related only to stimulation of the contralateral hand. *p* values for preregistered analyses B1 and B2 are reported one-tailed, and two-tailed for analysis B3. AI = anterior insula; aMCC = anterior midcingulate cortex; r/l S1 = right/left primary somatosensory cortex; r/l S2 = right/left secondary somatosensory cortex; *t*(degrees of freedom); *d<sub>z</sub>* = Cohen's *d*; <sup>†</sup> = trend; \* *p* < .05.

577 The pooled ANOVA (analysis B1 in Figure 2) showed significant main effects of target,  
578 hand, intensity and ROI, a significant target x intensity interaction, as well as all interactions  
579 involving the factor ROI (except for the four way interaction target x hand x intensity x ROI,  
580 see Table A6 in Supplement A). When comparing brain activity related to the placebo vs. the  
581 control hand encompassing pooled activation of all ROIs, we found no significant differences  
582 for self-related or other-related stimulation (self:  $M_{diff} = 0.212$ , 95%  $CI_{meandiff} [-0.44, 0.86]$ ;  
583 other:  $M_{diff} = 0.072$ , 95%  $CI_{meandiff} [-0.55, 0.70]$ ). The magnitudes of these effects were  
584 indistinguishable between self and other (self vs. other:  $M_{diff} = -0.139$ , 95%  $CI_{meandiff} [-1.18,$   
585  $0.90]$ ). The absence of effects in the pooled ANOVA might be explained by differential,  
586 inhomogeneous effects in the seven ROIs. As preregistered, and due to a significant main  
587 effect of ROI as well as significant interactions with the factor ROI, we went on to calculate  
588 single ANOVAs and complementary *t*-tests for each ROI separately (analysis B2 in Figure 2).

589 The separate ROI analyses of the three affective regions revealed a trend in left AI for  
590 self- but not for other-related stimulation, with the control hand showing slightly increased

## Somatosensory empathic sharing

591 activation compared to the placebo hand (self:  $M_{diff} = 0.825$ , 95%  $CI_{meandiff} [-0.22, 1.87]$ ; other:  
 592  $M_{diff} = 0.315$ , 95%  $CI_{meandiff} [-0.63, 1.26]$ ). We found no significant differences between  
 593 placebo and control hand in right AI or aMCC, neither for self- nor other-related stimulation  
 594 (right AI, self:  $M_{diff} = 0.200$ , 95%  $CI_{meandiff} [-0.78, 1.18]$ , other:  $M_{diff} = 0.211$ , 95%  $CI_{meandiff} [-$   
 595  $1.00, 0.58]$ ; aMCC, self:  $M_{diff} = 0.034$ , 95%  $CI_{meandiff} [-1.04, 0.97]$ , other:  $M_{diff} = 0.218$ , 95%  
 596  $CI_{meandiff} [-0.85, 1.29]$ ). The magnitudes of these effects were indistinguishable between self  
 597 and other (self vs. other, left AI:  $M_{diff} = -0.510$ , 95%  $CI_{meandiff} [-2.15, 1.13]$ ; right AI:  $M_{diff} = -$   
 598  $0.411$ , 95%  $CI_{meandiff} [-1.86, 1.04]$ ; aMCC:  $M_{diff} = 0.253$ , 95%  $CI_{meandiff} [-1.35, 1.86]$ ; see Figure  
 599 6 here and Table A7-A9 in the Supplement).

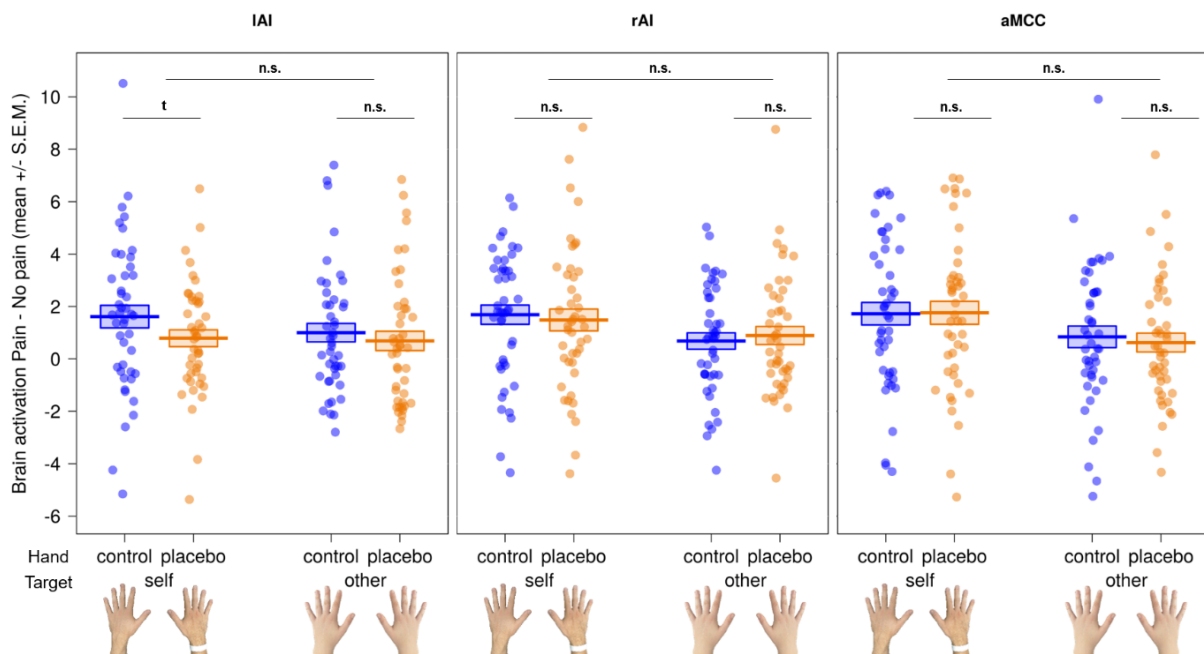

*Figure 6.* Paired comparisons of the region of interest (ROI) results for affective brain regions. Results in left anterior insula (IAI), right anterior insula (rAI) and anterior midcingulate cortex (aMCC) revealed no modulation in the three affective ROIs for self or other by the placebo manipulation. In other words, both hands led to similar hemodynamic activity in each ROI. We did find a trend (t) of  $p = .059$  one-tailed in left AI, with increased activity during stimulation of the control hand in the self condition. n.s. = not significant; S.E.M. = standard error of the mean.

600 The four somatosensory ROIs showed differential results for S1 and S2. The planned  
 601 comparisons in S1 revealed no differences between the hands, neither for self- nor other-  
 602 related stimulation (left S1, self:  $M_{diff} = -0.091$ , 95%  $CI_{meandiff} [-1.03, 0.85]$ , other:  $M_{diff} = 0.181$ ,  
 603 95%  $CI_{meandiff} [-0.68, 1.04]$ ; right S1: self:  $M_{diff} = 0.116$ , 95%  $CI_{meandiff} [-0.73, 0.96]$ , other:  $M_{diff} =$   
 604  $-0.142$ , 95%  $CI_{meandiff} [-0.69, 0.97]$ ). The magnitudes of these effects were indistinguishable

## Somatosensory empathic sharing

605 between self and other (self vs. other, left S1:  $M_{diff} = 0.271$ , 95%  $CI_{meandiff} [-1.13, 1.67]$ ; right  
606 S1:  $M_{diff} = 0.026$ , 95%  $CI_{meandiff} [-1.22, 1.27]$ ).

607 For left and right S2, however, we observed significant differences between placebo and  
608 control hand for self- but not for other-related stimulation (left S2, self:  $M_{diff} = -0.461$ , 95%  
609  $CI_{meandiff} [-0.96, 0.04]$ , other:  $M_{diff} = -0.262$ , 95%  $CI_{meandiff} [-0.82, 0.30]$ ; right S2, self:  $M_{diff} =$   
610  $0.928$ , 95%  $CI_{meandiff} [0.36, 1.50]$ ; other:  $M_{diff} = 0.124$ , 95%  $CI_{meandiff} [-0.54, 0.79]$ ). Interestingly,  
611 activity in left S2 was significantly higher for the contralateral placebo hand while this effect  
612 was reversed in right S2 (higher activity for contralateral control hand; see panel A in Figure  
613 7 here and Tables A10-A11 in Supplement A for full ANOVAs). The magnitudes of these  
614 effects were not different between self and other in left S2, but significantly different in right  
615 S2, where the difference between the two hands was higher for in the self condition (self vs.  
616 other, left S2:  $M_{diff} = 0.199$ , 95%  $CI_{meandiff} [-0.50, 0.90]$ ; right S2:  $M_{diff} = -0.804$ , 95%  $CI_{meandiff} [-$   
617  $1.67, 0.06]$ ; see panel B in Figure 7 here and Tables A12-A13 in Supplement A for full  
618 ANOVAs).

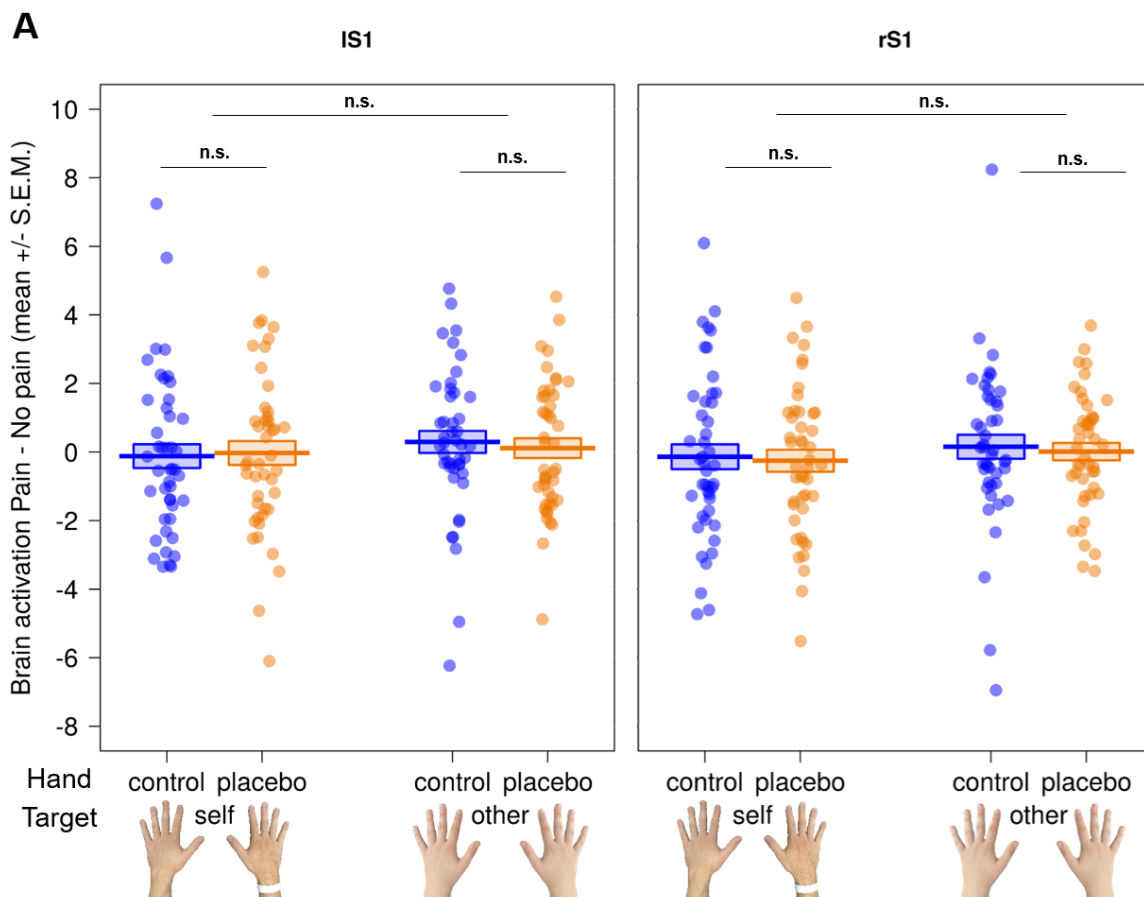

## Somatosensory empathic sharing

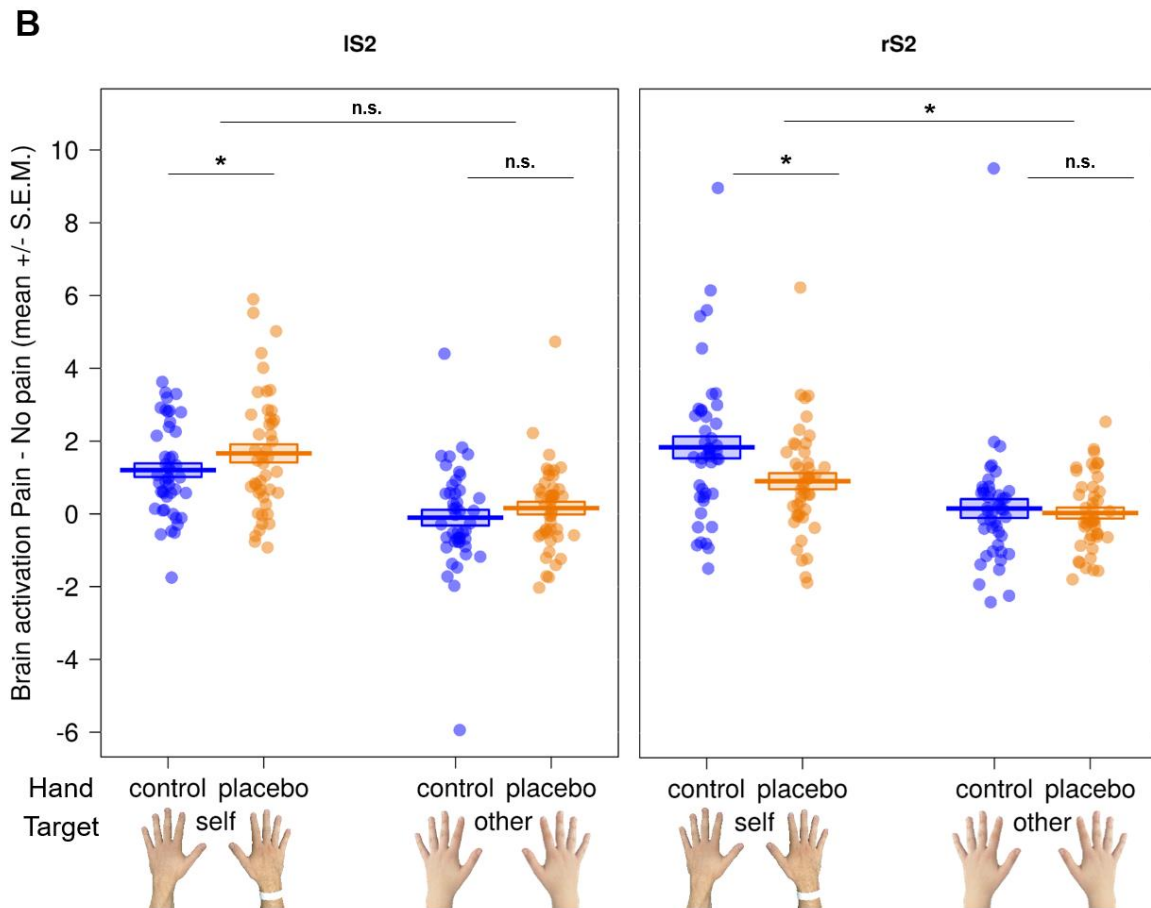

**Figure 7.** Paired comparisons of the region of interest (ROI) results for somatosensory brain regions. A) Results in left (IS1) and right (rS1) primary somatosensory cortex revealed no evidence for a modulation by the placebo manipulation in either hemisphere, neither for self nor other. B) Results in left (IS2) and right (rS2) secondary somatosensory cortex showed differential effects: In the self condition, hemodynamic activity was significantly increased in IS2 for the contralateral placebo hand, while activity was higher in rS2 for the contralateral control hand. Generally, we found no significant differences regarding other-related stimulation, but the first-hand placebo effect in IS2 was significantly stronger than its other-related counterpart. \* $p < .05$ ; n.s. = not significant; S.E.M. = standard error of the mean.

### 619 3.2.3 Post hoc analyses

620 Lastly, to gather more evidence for a localized placebo effect, we compared activation in  
 621 each hemisphere related only to the contralateral hand with each other, for self- and other-  
 622 related stimulation, respectively (analysis B3 in Figure 2; see Table 1 and Figure 8).

623 Mirroring the ROI results above, we found differential results for S1 and S2. Regarding  
 624 S1, there was no difference in brain activation between control and placebo hand for self- or  
 625 other-related stimulation (self:  $M_{diff} = 0.553$ , 95%  $CI_{meandiff} [-0.72, 1.82]$ ; other:  $M_{diff} = -0.37$ ,  
 626 95%  $CI_{meandiff} [-1.37, 0.64]$ ). The magnitude of these effects did not differ between self and  
 627 other (self vs. other:  $M_{diff} = 0.92$ , 95%  $CI_{meandiff} [-0.82, 2.66]$ ).

Somatosensory empathic sharing

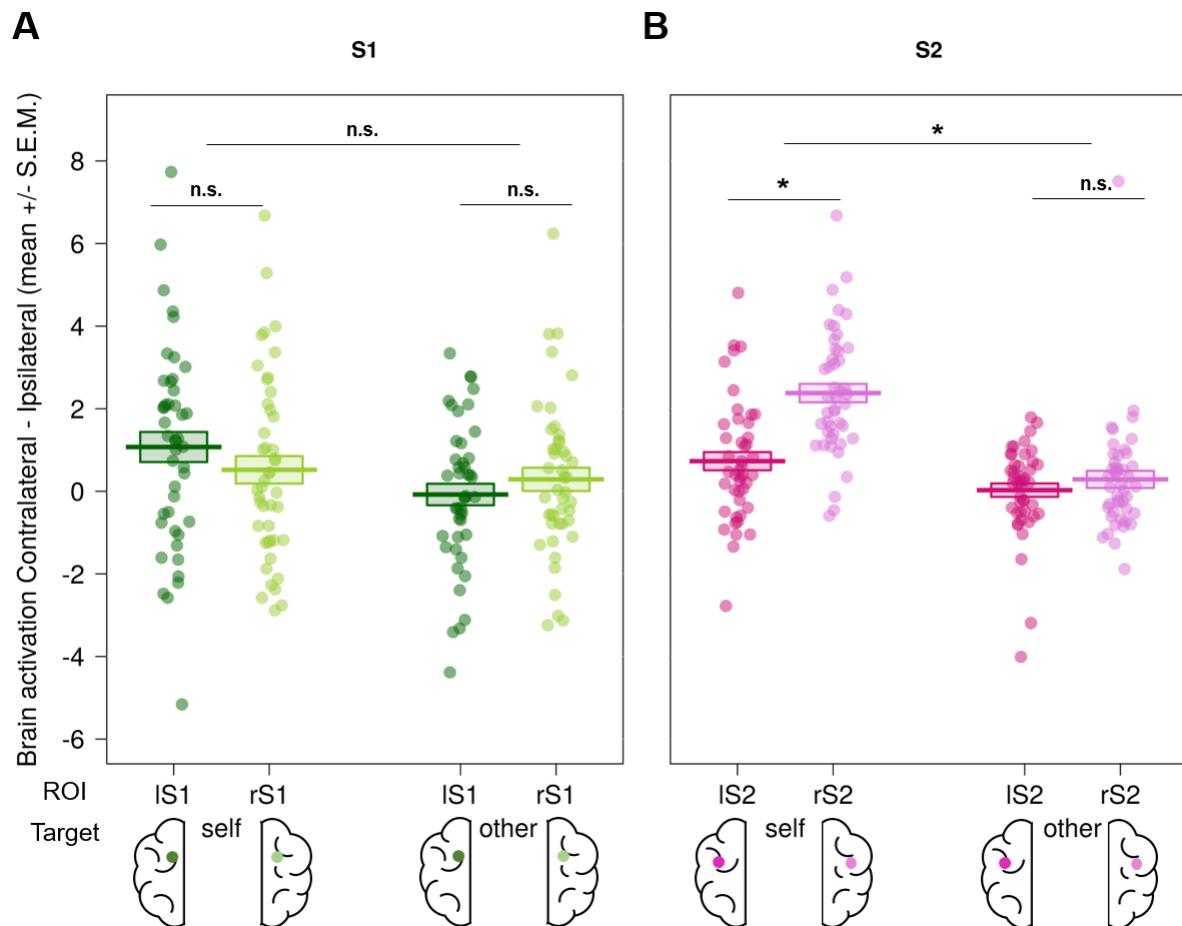

**Figure 8.** Evidence for a first-hand localized placebo analgesia effect in secondary somatosensory cortex (S2). We compared activity for each hemisphere related only to the contralateral hand with each other, i.e. activation in right primary somatosensory cortex (S1) during stimulation of left (contralateral) control hand vs. activation in left S1 during stimulation of the right (contralateral) placebo hand, and the same for secondary somatosensory cortex (S2). This was done separately for self- and other-related stimulation. A) For S1, we found no evidence for a modulation by the placebo manipulation. B) For S2, we observed increased activity in right compared to left S2 in the self condition. In general, we did not find a difference between hemispheres for the other-condition. The difference in S2 for first-hand pain was significantly stronger than its other-related counterpart. \* $p < .05$ ; n.s. = not significant; S.E.M. = standard error of the mean.

628 Regarding S2, we found a significant difference in brain activation between control and  
 629 placebo hand for self-related pain, with the right S2 contralateral to the control hand showing  
 630 increased activation compared to the left S2 contralateral to placebo hand (rS2 vs. IS2 for  
 631 self:  $M_{diff} = -1.65$ , 95%  $CI_{meandiff} [-2.42, -0.88]$ ;  $M_{rS2} \pm SD = 2.38 \pm 1.49$ ,  $M_{IS2} \pm SD = 0.73 \pm$   
 632  $1.48$ ). In other words, stimulation of the control hand produced significantly greater  
 633 contralateral S2 activation than stimulation of the placebo hand. Regarding other-related  
 634 stimulation, we did not find a difference between the right and left S2 (rS2 vs. IS2 for other:  
 635  $M_{diff} = -0.26$ , 95%  $CI_{meandiff} [-0.96, 0.44]$ ;  $M_{rS2} \pm SD = 0.29 \pm 1.39$ ,  $M_{IS2} \pm SD = 0.03 \pm 1.09$ ).  
 636 Comparing these two effects between self and other showed a significant difference, i.e.

637 evidence for a placebo effect for the self, but not for the other (self vs. other:  $M_{diff} = -1.39$ ,  
638 95%  $CI_{meandiff} [-2.37, -0.41]$ ,  $M_{self} \pm SD = 1.65 \pm 2.57$ ,  $M_{other} \pm SD = 0.26 \pm 2.32$ ).

639 In sum, we replicated previous results regarding shared activations, as we observed an  
640 overlap of affective brain regions for self- and other-related stimulation. In line with the  
641 behavioral results, the fMRI results suggested that we successfully induced a localized first-  
642 hand placebo analgesia effect in the right hand of our participants, visible in increased brain  
643 activity related to the left control hand in contralateral S2. This effect, however, did not  
644 transfer to empathy for another's pain, as we did not observe modulation of brain activity in  
645 S2 (or S1) by the placebo in the empathy condition.

#### 646 **4 Discussion**

647 In this preregistered study, we addressed the debated question what role somatosensory  
648 aspects of the first-hand pain experience play during empathizing with someone else in pain.  
649 In particular, we wanted to pinpoint whether, when we witness another's pain, sharing their  
650 somatosensory representations plays a similar causal role as previously shown for affective  
651 representations (e.g. Rütgen, Seidel, Silani, et al., 2015). To test this question, we induced  
652 localized placebo analgesia on the right hand of 45 participants by means of a placebo gel  
653 (with the left hand acting as a control). We then measured brain activity with fMRI during a  
654 pain task tailored towards observing possible involvement of the sensory-discriminative  
655 component of empathic pain processing. While our findings indicated both behavioral and  
656 fMRI evidence for a robust first-hand, localized placebo analgesia effect, we did not observe  
657 a transfer of this effect to empathy for pain. We thus found no causal evidence for the  
658 involvement of the sensory-discriminative component in the processing of empathic pain.

659 Regarding pain empathy, our findings replicated the well-documented overlap between  
660 first-hand and empathy for pain in bilateral AI and aMCC, as reported extensively in previous  
661 studies (Corradi-Dell'Acqua et al., 2011; Lamm et al., 2011 for a meta-analysis; Ochsner et  
662 al., 2008; Singer et al., 2004; Zaki et al., 2016 for a review). Moreover, the other-related pain  
663 and self-experienced unpleasantness ratings indicated that participants engaged in the task  
664 and felt empathy for the other person. Thus, participants not only correctly evaluated the pain

## Somatosensory empathic sharing

665 of the other person, but also showed an empathic response. However, despite these  
666 findings, we did not observe a localized transfer of the first-hand placebo analgesia effect to  
667 empathy. Behaviorally, participants showed no reduction in empathy ratings for the placebo  
668 hand. This lack of inference-statistical significance was further corroborated by much smaller  
669 effect sizes, and strong evidence against a transfer of this effect to empathy in the Bayesian  
670 analyses. Analysis of the fMRI data directly mirrored these results, as we did not observe any  
671 differences in other-related brain activation between the two hands.

672 Although we did not observe a transfer of the placebo analgesia effect to empathy for  
673 pain, our behavioral results regarding self pain showed a strong, localized placebo analgesia  
674 effect, as evidenced by significantly reduced pain ratings for the placebo hand compared to  
675 the control hand, a large effect size and very strong evidence for this effect in the Bayesian  
676 analyses. This was expected, as our sample criteria excluded nonresponders to the placebo  
677 manipulation. We corroborated this finding on the neural level by showing increased  
678 activation in right S2 during stimulation of the contralateral control hand compared to the  
679 placebo hand, while this effect was reversed in left S2, which indicated stronger activation for  
680 the contralateral placebo hand. These results mirror studies finding a contralateral bias in  
681 somatosensory brain areas (Bingel et al., 2003; Coghill et al., 1999; Ploner et al., 1999;  
682 Singer et al., 2004; Symonds et al., 2006). When specifically comparing contralateral  
683 activation related to each hand with each other, we found further evidence in S2, with  
684 stronger activation in right S2 (related to the contralateral control hand) compared to left S2  
685 (related to the contralateral placebo hand). Furthermore, we observed increased  
686 hemodynamic activity in affective brain areas and contralateral S2 in the control hand  
687 compared to the placebo hand, as well as increased activity in DLPFC and contralateral S2  
688 during stimulation of the placebo hand compared to the control hand. These results replicate  
689 the typical placebo analgesia network reported in prior studies using similar local (Eippert et  
690 al., 2009; Geuter et al., 2013; Schafer et al., 2015; Schenk et al., 2014; Tinnermann et al.,  
691 2017), or global placebo analgesia inductions (Mischkowski et al., 2016; Rütgen, Seidel,  
692 Riečanský, et al., 2015; Rütgen, Seidel, Silani, et al., 2015; see Colloca et al., 2013;



## Somatosensory empathic sharing

693 Meissner et al., 2011; Wager et al., 2011 for reviews). Together, these results demonstrate  
694 the successful induction of a first-hand, localized placebo analgesia effect on the behavioral  
695 and neural level (for S2). Interestingly, we found no evidence for such an effect in our chosen  
696 ROIs of right and left S1 representing the “hand areas”. S1 has often been implicated in the  
697 processing of stimulation in general (Ploner et al., 2000) and our design subtracted non-  
698 painful stimulation to control for unspecific touch-related activation. In fact, we did not  
699 observe any activation in the whole brain contrast [*self - pain* > *self - no pain*] for both hands  
700 in the area we selected for our ROI analysis (Bingel et al., 2004), but instead observed  
701 activation in a different, more dorsomedial cluster.

702 Although we found increased brain activity in affective-motivational brain areas for the  
703 control compared to the placebo hand on a whole brain level, our ROI analyses did not show  
704 any modulation by the placebo manipulation during self-related stimulation (except for a  
705 trend in right AI showing increased activity for the control hand, consistent with our  
706 predictions). This may seem contradictory to what was reported by Rütgen, Seidel, Silani, et  
707 al. (2015). However, it should be noted that in that study, two groups with either placebo  
708 analgesia or control were compared, while the current design made comparisons within  
709 participants who all underwent placebo analgesia, with a specific focus on somatosensory  
710 aspects of the pain experience. Moreover, we employed a localized compared to a  
711 generalized placebo analgesia induction, which may also have influenced the affective-  
712 motivational component of first-hand pain. Thus, we cannot draw any conclusions about the  
713 here absent modulation of affective regions during self-experienced pain.

714 To answer our research question, we documented clear evidence for a localized placebo  
715 effect in first-hand pain but find no evidence for a transfer of this effect to empathy for pain,  
716 and thus no evidence for somatosensory sharing. As these results were contrary to our  
717 preregistered predictions, we now discuss why this could have been the case, highlighting  
718 strengths and possible limitations. First of all, we preregistered our design and procedure as  
719 well as most of the planned analyses prior to data collection and clearly distinguish those  
720 from post hoc analyses, thereby minimizing the possibility of false-positives and *p*-hacking

## Somatosensory empathic sharing

721 (Crüwell et al., 2019; Nosek et al., 2018; Wicherts et al., 2016). Furthermore, we purposefully  
722 used a within-subjects design and an *a priori* power analysis to maximize sensitivity and the  
723 possibility of finding an effect (Beck, 2013; Charness et al., 2012). In contrast to previous  
724 studies, our design was specifically tailored to being able to observe possible somatosensory  
725 modulation. Our findings are further supported by observation of the typical pain processing  
726 network during first-hand electrical stimulation, demonstrating validity of our pain paradigm  
727 (Morton et al., 2016; Xu et al., 2020). These points strongly speak for the validity of our  
728 design and additionally bolster the interpretability of our results.

729 Although we specifically targeted somatosensory pain processing, participants might still  
730 have focused more on the generalized, affective consequences of the other's pain instead of  
731 processing its localized, somatosensory consequences. This would be in line with results of  
732 an ERP study by Rütgen, Seidel, Riečanský, et al. (2015), who did not find effects of placebo  
733 analgesia on both anticipation and delivery phases in the ERP components P1 and N1 or on  
734 non-painful control stimulation (for both self- and other-related conditions). While P1 is an  
735 occipital ERP component that has been shown to index an early stage of low-level visual  
736 processing and was also linked to top-down attentional processes, the visual N1 component  
737 has been associated with attention and discrimination processes (Couperus & Mangun,  
738 2010; Slagter et al., 2016). Due to these results, the authors argued that it is unlikely that  
739 placebo analgesia changed general aspects of sensory perception or attention in their study,  
740 but targeted affective aspects of the empathic pain experience. This might suggest that  
741 somatosensory-related processes are only or more strongly recruited by the first-hand pain  
742 experience and, therefore, do not play a strong role in empathic sharing (Decety, 2010;  
743 Jackson et al., 2006; Krishnan et al., 2016; Rütgen, Seidel, Riečanský, et al., 2015; Rütgen,  
744 Seidel, Silani, et al., 2015). Sharing the pain of others could therefore also be possible in the  
745 absence of first-hand nociception, which is important in the context of shared representations  
746 between one's own and empathic pain experiences. Our results indicate that previously  
747 found empathy-related activations of sensorimotor processes do not necessarily indicate a  
748 specific sharing of another's pain in one's own pain processing system. In fact, a meta-

## Somatosensory empathic sharing

749 analysis by Lamm et al. (2011) proposed that previously reported somatosensory activation  
750 during empathy for pain could reflect “rather unspecific co-activation elicited by the display of  
751 body parts being touched rather than a specific matching of the other's somatosensory and  
752 nociceptive state” (p. 2499), as this activation was observed bilaterally and for painful and  
753 non-painful stimulation in the meta-analysis (but see also Keysers et al., 2010). In line with  
754 this argumentation, Keysers et al. (2004) found S2 (but not S1) to be active during both first-  
755 hand and empathy for touch, which matches our results on the first-hand placebo analgesia  
756 effect being represented only in S2.

757       Sharing of another individual's pain might be especially focused on its affective aspects,  
758 when a fast and effective processing of the situation does not necessarily require specific  
759 somatosensory-related knowledge of pain. In our task, the perception of how unpleasant or  
760 aversive the stimulation was for the other, i.e. a general processing of that pain and its  
761 related affective consequences, might have been a more relevant dimension than the exact  
762 location of that pain (i.e. the hand). Future studies may thus want to differentiate between  
763 situations when observing another person in pain is merely related to affective sharing per  
764 se, versus a prompt for specific knowledge about another's pain, such as when specific  
765 helping behavior is required. For instance, it may make a difference if participants are only  
766 asked to “resonate” with the pain of others without any specific request, as in our study,  
767 compared to a setup simulating e.g. the work of medical professions, where it does not  
768 suffice to resonate with the affective response but where the exact source of the pain is of  
769 higher relevance. A recent review suggested that sensorimotor activations to another's pain  
770 could also reflect “activation of defensive responses in agreement with the goal of pain”, in  
771 order to protect the body from external harm (Riečanský & Lamm, 2019, p. 970). Those  
772 responses could thus be seen as less relevant, when the situation is known to be unpleasant  
773 and aversive but does not require helping behavior. This may also explain the discrepancy of  
774 our findings with a recent study finding a causal role of S1 in driving prosocial behavior (Gallo  
775 et al., 2018). In addition to this reasoning, previous studies showing a role of sensorimotor or  
776 somatosensory brain regions in pain empathy used a) salient video stimuli depicting painful

## Somatosensory empathic sharing

777 needle injections into body parts and/or b) different setups and instructions, specifically  
778 prompting participants to reason about the sensory consequences of the stimulation and  
779 direct their attention to the specific, affected body part (Avenanti et al., 2005, 2006; Bufalari  
780 et al., 2007; Lamm et al., 2007; Motoyama et al., 2017). Despite our findings, i.e. an absence  
781 of evidence for somatosensory sharing, we therefore cannot completely rule out the  
782 possibility of still having missed somatosensory involvement with our design, since most of  
783 the studies reporting somatosensory brain activation in response to empathic processing  
784 used picture-based tasks where explicit images of limbs in painful situations are shown, while  
785 we used electrical stimulation in the present study (Lamm et al., 2011 for a meta-analysis;  
786 Xiang et al., 2018 for a review). We are currently investigating this possibility in a separate  
787 study employing a typical picture-based paradigm. However, finding complementary results  
788 in both behavior and brain responses and further evidence in our post hoc analyses, we are  
789 confident in our conclusion that the somatosensory component of pain does not play a  
790 causal role in pain empathy, in the present design.

## 791 **5 Conclusion**

792 Our findings suggest a robust localized placebo analgesia effect for first-hand pain, but no  
793 evidence for a role of the sensory-discriminative component in empathic sharing.  
794 Nevertheless, we observed shared brain activations between first-hand and empathy for pain  
795 in the affective-motivational component. Using a causal-experimental manipulation and a  
796 tailored design, empathy for another person was not influenced by a localized pain reduction  
797 in a specific body part, thereby not confirming our preregistered predictions. These insights  
798 are important when trying to characterize the magnitude of influence that our own pain  
799 experience has on our ability to empathize and suggest that empathy for pain, at least when  
800 investigated with the type of paradigms used here and previously, may rely more on sharing  
801 of another's affective, compared to their somatosensory state.

## 802 **6 Acknowledgements**

803 We thank Ronald Sladky for input on a final draft of the preregistration and Paul Forbes  
804 for feedback on the final draft of the manuscript. We would also like to thank the two master

805 students Fabian Franken and Anna Köstler who worked on this project as well as the  
806 numerous interns and confederates helping with data collection.

## 807 **7 Author contributions**

808 **Helena Hartmann:** Conceptualization, Data curation, Formal analysis, Funding  
809 acquisition, Investigation, Methodology, Software, Visualization, Writing - original draft,  
810 Writing - review & editing. **Markus Rütgen:** Formal analysis, Methodology, Supervision,  
811 Writing - original draft, Writing - review & editing. **Federica Riva:** Formal analysis,  
812 Supervision, Writing - original draft, Writing - review & editing. **Claus Lamm:**  
813 Conceptualization, Formal analysis, Funding acquisition, Methodology, Project  
814 administration, Resources, Supervision, Writing - original draft, Writing - review & editing.

## 815 **8 Declarations of interest**

816 None.

## 817 **9 Funding**

818 This study was financially supported by the uni:docs scholarship (awarded to H.H.) of the  
819 University of Vienna, the doctoral program Cognition and Communication of the University of  
820 Vienna, the Austrian Science Fund (FWF W1262-B29), as well as the Vienna Science and  
821 Technology Fund (WWTF VRG13-007). None of the funders had any role in study design,  
822 data collection and analysis, interpretation, writing or decision to publish.

## 823 **10 References**

- 824 Amanzio, M., Benedetti, F., Porro, C. A., Palermo, S., & Cauda, F. (2013). Activation  
825 likelihood estimation meta-analysis of brain correlates of placebo analgesia in human  
826 experimental pain. *Human Brain Mapping, 34*(3), 738–752.  
827 <https://doi.org/10.1002/hbm.21471>
- 828 Atlas, L. Y., & Wager, T. D. (2012). How expectations shape pain. *Neuroscience Letters,*  
829 *520*(2), 140–148. <https://doi.org/10.1016/j.neulet.2012.03.039>
- 830 Avenanti, A., Buetti, D., Galati, G., & Aglioti, S. M. (2005). Transcranial magnetic stimulation  
831 highlights the sensorimotor side of empathy for pain. *Nature Neuroscience, 8*(7), 955–  
832 960. <https://doi.org/10.1038/nn1481>
- 833 Avenanti, A., Paluello, I. M., Bufalari, I., & Aglioti, S. M. (2006). Stimulus-driven modulation of  
834 motor-evoked potentials during observation of others' pain. *NeuroImage, 32*(1), 316–  
835 324. <https://doi.org/10.1016/j.neuroimage.2006.03.010>
- 836 Bastiaansen, J. A. C. J., Thioux, M., & Keysers, C. (2009). Evidence for mirror systems in  
837 emotions. *Philosophical Transactions of the Royal Society B: Biological Sciences,*

- 838 364(1528), 2391–2404. <https://doi.org/10.1098/rstb.2009.0058>
- 839 Beck, T. W. (2013). The importance of a priori sample size estimation in strength and  
840 conditioning research. *Journal of Strength and Conditioning Research*, 27(8), 2323–  
841 2337. <https://doi.org/10.1519/JSC.0b013e318278eea0>
- 842 Benedetti, F., Arduino, C., & Amanzio, M. (1999). Somatotopic activation of opioid systems  
843 by target-directed expectations of analgesia. *Journal of Neuroscience*, 19(9), 3639–  
844 3648. <https://doi.org/10.1523/jneurosci.19-09-03639.1999>
- 845 Benedetti, F., Mayberg, H. S., Wager, T. D., Stohler, C. S., & Zubieta, J.-K. (2005).  
846 Neurobiological mechanisms of the placebo effect. *Journal of Neuroscience*, 25(45),  
847 10390–10402. <https://doi.org/10.1523/JNEUROSCI.3458-05.2005>
- 848 Benedetti, F., & Piedimonte, A. (2019). The neurobiological underpinnings of placebo and  
849 nocebo effects. *Seminars in Arthritis and Rheumatism*, 49(3), 18–21.  
850 <https://doi.org/10.1016/j.semarthrit.2019.09.015>
- 851 Benuzzi, F., Lui, F., Ardizzi, M., Ambrosecchia, M., Ballotta, D., Righi, S., Pagnoni, G.,  
852 Gallese, V., & Porro, C. A. (2018). Pain mirrors: Neural correlates of observing self or  
853 others' facial expressions of pain. *Frontiers in Psychology*, 9(October), 1825.  
854 <https://doi.org/10.3389/fpsyg.2018.01825>
- 855 Bingel, U., Lorenz, J., Glauche, V., Knab, R., Gläscher, J., Weiller, C., & Büchel, C. (2004).  
856 Somatotopic organization of human somatosensory cortices for pain: A single trial fMRI  
857 study. *NeuroImage*, 23(1), 224–232. <https://doi.org/10.1016/j.neuroimage.2004.05.021>
- 858 Bingel, U., Lorenz, J., Schoell, E. D., Weiller, C., & Büchel, C. (2006). Mechanisms of  
859 placebo analgesia: rACC recruitment of a subcortical antinociceptive network. *Pain*,  
860 120(1–2), 8–15. <https://doi.org/10.1016/j.pain.2005.08.027>
- 861 Bingel, U., Quante, M., Knab, R., Bromm, B., Weiller, C., & Büchel, C. (2003). Single trial  
862 fMRI reveals significant contralateral bias in responses to laser pain within thalamus and  
863 somatosensory cortices. *NeuroImage*, 18(3), 740–748. [https://doi.org/10.1016/S1053-8119\(02\)00033-2](https://doi.org/10.1016/S1053-8119(02)00033-2)
- 865 Bingel, U., Schoell, E., Herken, W., Büchel, C., & May, A. (2007). Habituation to painful  
866 stimulation involves the antinociceptive system. *Pain*, 131(1–2), 21–30.  
867 <https://doi.org/10.1016/j.pain.2006.12.005>
- 868 Brett, M., Romain, J.-L., Valabregue, A., & Jean-Baptiste, P. (2002). Region of interest  
869 analysis using an SPM toolbox [abstract]. *Presented at the 8th International Conference*  
870 *on Functional Mapping of the Human Brain, June 2-6, Sendai, Japan. Available on CD-*  
871 *ROM in NeuroImage, Vol. 16, No. 2.*
- 872 Bufalari, I., Aprile, T., Avenanti, A., di Russo, F., & Aglioti, S. M. (2007). Empathy for pain  
873 and touch in the human somatosensory cortex. *Cerebral Cortex*, 17(11), 2553–2561.  
874 <https://doi.org/10.1093/cercor/bhl161>
- 875 Charness, G., Gneezy, U., & Kuhn, M. A. (2012). Experimental methods: Between-subject  
876 and within-subject design. *Journal of Economic Behavior and Organization*, 81(1), 1–8.  
877 <https://doi.org/10.1016/j.jebo.2011.08.009>
- 878 Coghill, R. C., Sang, C. N., Maisog, J. M., & Iadarola, M. J. (1999). Pain intensity processing  
879 within the human brain: A bilateral, distributed mechanism. *Journal of Neurophysiology*,  
880 82(4), 1934–1943. <https://doi.org/10.1152/jn.1999.82.4.1934>
- 881 Coll, M.-P., Viding, E., Rütgen, M., Silani, G., Lamm, C., Catmur, C., & Bird, G. (2017). Are  
882 we really measuring empathy? Proposal for a new measurement framework.  
883 *Neuroscience & Biobehavioral Reviews*, 83(October), 132–139.  
884 <https://doi.org/10.1016/j.neubiorev.2017.10.009>
- 885 Colloca, L., Klinger, R., Flor, H., & Bingel, U. (2013). Placebo analgesia: Psychological and  
886 neurobiological mechanisms. *Pain*, 154(4), 511–514.

- 887 <https://doi.org/10.1038/jid.2014.371>
- 888 Corradi-Dell'Acqua, C., Hofstetter, C., & Vuilleumier, P. (2011). Felt and seen pain evoke the  
889 same local patterns of cortical activity in insular and cingulate cortex. *Journal of*  
890 *Neuroscience*, 31(49), 17996–18006. <https://doi.org/10.1523/JNEUROSCI.2686->  
891 11.2011
- 892 Corsi, N., & Colloca, L. (2017). Placebo and nocebo effects: The advantage of measuring  
893 expectations and psychological factors. *Frontiers in Psychology*, 8(March), 308.  
894 <https://doi.org/10.3389/fpsyg.2017.00308>
- 895 Couperus, J. W., & Mangun, G. R. (2010). Signal enhancement and suppression during  
896 visual-spatial selective attention. *Brain Research*, 1359, 155–177.  
897 <https://doi.org/10.1016/j.brainres.2010.08.076>
- 898 Cruccu, G., Aminoff, M. J., Curio, G., Guerit, J. M., Kakigi, R., Mauguiere, F., Rossini, P. M.,  
899 Treede, R. D., & Garcia-Larrea, L. (2008). Recommendations for the clinical use of  
900 somatosensory-evoked potentials. *Clinical Neurophysiology*, 119(8), 1705–1719.  
901 <https://doi.org/10.1016/j.clinph.2008.03.016>
- 902 Crüwell, S., Stefan, A., & Evans, N. J. (2019). Robust standards in cognitive science.  
903 *Computational Brain & Behavior*, 2(3–4), 255–265.  
904 <https://doi.org/10.31234/OSF.IO/4RS6Q>
- 905 de Vignemont, F., & Singer, T. (2006). The empathic brain: How, when and why? *Trends in*  
906 *Cognitive Sciences*, 10(10), 435–441. <https://doi.org/10.1016/j.tics.2006.08.008>
- 907 Decety, J. (2010). To what extent is the experience of empathy mediated by shared neural  
908 circuits? *Emotion Review*, 2(3), 204–207. <https://doi.org/10.1177/1754073910361981>
- 909 Ding, R., Ren, J., Li, S., Zhu, X., Zhang, K., & Luo, W. (2019). Domain-general and domain-  
910 preferential neural correlates underlying empathy towards physical pain, emotional  
911 situation and emotional faces: An ALE meta-analysis. *Neuropsychologia*, 107286.  
912 <https://doi.org/10.1016/j.neuropsychologia.2019.107286>
- 913 Duff, E. P., Cunnington, R., & Egan, G. F. (2007). REX: Response exploration for  
914 neuroimaging datasets. *Neuroinformatics*, 5(4), 223–234.  
915 <https://doi.org/10.1007/s12021-007-9001-y>
- 916 Eickhoff, S. B., Stephan, K. E., Mohlberg, H., Grefkes, C., Fink, G. R., Amunts, K., & Zilles,  
917 K. (2005). A new SPM toolbox for combining probabilistic cytoarchitectonic maps and  
918 functional imaging data. *NeuroImage*, 25(4), 1325–1335.  
919 <https://doi.org/10.1016/j.neuroimage.2004.12.034>
- 920 Eippert, F., Bingel, U., Schoell, E. D., Yacubian, J., Klinger, R., Lorenz, J., & Büchel, C.  
921 (2009). Activation of the opioidergic descending pain control system underlies placebo  
922 analgesia. *Neuron*, 63(4), 533–543. <https://doi.org/10.1016/j.neuron.2009.07.014>
- 923 Fabi, S., & Leuthold, H. (2017). Empathy for pain influences perceptual and motor  
924 processing: Evidence from response force, ERPs, and EEG oscillations. *Social*  
925 *Neuroscience*, 12(6), 701–716. <https://doi.org/10.1080/17470919.2016.1238009>
- 926 Fan, Y., Duncan, N., de Greck, M., & Northoff, G. (2011). Is there a core neural network in  
927 empathy? An fMRI based quantitative meta-analysis. *Neuroscience and Biobehavioral*  
928 *Reviews*, 35(3), 903–911. <https://doi.org/10.1016/j.neubiorev.2010.10.009>
- 929 Faul, F., Erdfelder, E., Lang, A.-G., & Buchner, A. (2007). G\*Power 3: A flexible statistical  
930 power analysis program for the social, behavioral, and biomedical sciences. *Behavior*  
931 *Research Methods*, 39(2), 175–191. <https://doi.org/10.1088/1755-1315/148/1/012022>
- 932 Gallo, S., Paracampo, R., Müller-Pinzler, L., Severo, M. C., Blömer, L., Fernandes-  
933 Henriques, C., Henschel, A., Lammes, B. K., Maskaljunas, T., Suttrup, J., Avenanti, A.,  
934 Keyzers, C., & Gazzola, V. (2018). The causal role of the somatosensory cortex in  
935 prosocial behaviour. *ELife*, 7(May), e32740. <https://doi.org/10.7554/eLife.32740>

- 936 Geuter, S., Eippert, F., Hindi Attar, C., & Büchel, C. (2013). Cortical and subcortical  
937 responses to high and low effective placebo treatments. *NeuroImage*, *67*, 227–236.  
938 <https://doi.org/10.1016/j.neuroimage.2012.11.029>
- 939 Giolla, E. Mac, & Ly, A. (2019). What to do with all these Bayes factors: How to make  
940 Bayesian reports in deception research more informative. *Legal and Criminological*  
941 *Psychology*, *3*, 1–7. <https://doi.org/10.1111/lcrp.12162>
- 942 Haggard, P., Iannetti, G. D., & Longo, M. R. (2013). Spatial sensory organization and body  
943 representation in pain perception. *Current Biology*, *23*(4), R164–R176.  
944 <https://doi.org/10.1016/j.cub.2013.01.047>
- 945 Hall, J. A., & Schwartz, R. (2019). Empathy present and future. *Journal of Social Psychology*,  
946 *159*(3), 225–243. <https://doi.org/10.1080/00224545.2018.1477442>
- 947 Hartmann, H., Rütgen, M., Sladky, R., & Lamm, C. (2018). *Another's pain in my brain:*  
948 *Clarifying the specificity of the effects of placebo analgesia on first-hand and empathy*  
949 *for pain | OSF Registries*. <https://osf.io/uwzb5>
- 950 Jackson, P. L., Meltzoff, A. N., & Decety, J. (2005). How do we perceive the pain of others?  
951 A window into the neural processes involved in empathy. *NeuroImage*, *24*(3), 771–779.  
952 <https://doi.org/10.1016/j.neuroimage.2004.09.006>
- 953 Jackson, P. L., Rainville, P., & Decety, J. (2006). To what extent do we share the pain of  
954 others? Insight from the neural bases of pain empathy. *Pain*, *125*(1–2), 5–9.  
955 <https://doi.org/10.1016/j.pain.2006.09.013>
- 956 Jarosz, A. F., & Wiley, J. (2014). What are the odds? A practical guide to computing and  
957 reporting Bayes factors. *Journal of Problem Solving*, *7*(1), 2–9.  
958 <https://doi.org/10.1109/ICASSP.2005.1415890>
- 959 Jauniaux, J., Khatibi, A., Rainville, P., & Jackson, P. L. (2019). A meta-analysis of  
960 neuroimaging studies on pain empathy: Investigating the role of visual information and  
961 observers' perspective. *Social, Cognitive and Affective Neuroscience*, *14*(8), 789–813.  
962 <https://doi.org/https://doi.org/10.1093/scan/nsz055>
- 963 Keysers, C., & Gazzola, V. (2006). Towards a unifying neural theory of social cognition.  
964 *Progress in Brain Research*, *156*, 379–401. [https://doi.org/10.1016/S0079-](https://doi.org/10.1016/S0079-6123(06)56021-2)  
965 [6123\(06\)56021-2](https://doi.org/10.1016/S0079-6123(06)56021-2)
- 966 Keysers, C., Kaas, J. H., & Gazzola, V. (2010). Somatosensation in social perception. *Nature*  
967 *Reviews Neuroscience*, *11*(6), 417–428. <https://doi.org/10.1038/nrn2919>
- 968 Keysers, C., Wicker, B., Gazzola, V., Anton, J.-L., Fogassi, L., & Gallese, V. (2004). A  
969 touching sight: SII/PV activation during the observation and experience of touch.  
970 *Neuron*, *42*(2), 335–346. [https://doi.org/10.1016/S0896-6273\(04\)00156-4](https://doi.org/10.1016/S0896-6273(04)00156-4)
- 971 Krishnan, A., Woo, C.-W., Chang, L. J., Ruzic, L., Gu, X., López-Solà, M., Jackson, P. L.,  
972 Pujó, J., Fan, J., & Wager, T. D. (2016). Somatic and vicarious pain are represented by  
973 dissociable multivariate brain patterns. *eLife*, *5*, 1–42.  
974 <https://doi.org/10.7554/eLife.15166>
- 975 Lamm, C., Bukowski, H., & Silani, G. (2016). From shared to distinct self-other  
976 representations in empathy: Evidence from neurotypical function and socio-cognitive  
977 disorders. *Philosophical Transactions of the Royal Society of London. Series B,*  
978 *Biological Sciences*, *371*(1686), 20150083. <https://doi.org/10.1098/rstb.2015.0083>
- 979 Lamm, C., Decety, J., & Singer, T. (2011). Meta-analytic evidence for common and distinct  
980 neural networks associated with directly experienced pain and empathy for pain.  
981 *NeuroImage*, *54*(3), 2492–2502. <https://doi.org/10.1016/j.neuroimage.2010.10.014>
- 982 Lamm, C., & Majdandžić, J. (2015). The role of shared neural activations, mirror neurons,  
983 and morality in empathy - A critical comment. *Neuroscience Research*, *90*, 15–24.  
984 <https://doi.org/10.1016/j.neures.2014.10.008>



## Somatosensory empathic sharing

- 985 Lamm, C., Nusbaum, H. C., Meltzoff, A. N., & Decety, J. (2007). What are you feeling? Using  
986 functional magnetic resonance imaging to assess the modulation of sensory and  
987 affective responses during empathy for pain. *PLoS ONE*, 2(12), e1292.  
988 <https://doi.org/10.1371/journal.pone.0001292>
- 989 Lamm, C., Rütgen, M., & Wagner, I. C. (2019). Imaging empathy and prosocial emotions.  
990 *Neuroscience Letters*, 693, 49–53. <https://doi.org/10.1016/j.neulet.2017.06.054>
- 991 Lockwood, P. L. (2016). The anatomy of empathy: Vicarious experience and disorders of  
992 social cognition. *Behavioural Brain Research*, 311, 255–266.  
993 <https://doi.org/10.1016/j.bbr.2016.05.048>
- 994 Lockwood, P. L., Iannetti, G. D., & Haggard, P. (2013). Transcranial magnetic stimulation  
995 over human secondary somatosensory cortex disrupts perception of pain intensity.  
996 *Cortex*, 49, 2201–2209. <https://doi.org/10.1016/j.cortex.2012.10.006>
- 997 Loggia, M. L., Mogil, J. S., & Bushnell, M. C. (2008). Empathy hurts: Compassion for another  
998 increases both sensory and affective components of pain perception. *Pain*, 136, 168–  
999 176. <https://doi.org/10.1016/j.pain.2007.07.017>
- 1000 Marsh, A. A. (2018). The neuroscience of empathy. *Current Opinion in Behavioral Sciences*,  
1001 19, 110–115. <https://doi.org/10.1002/9781118650868.ch8>
- 1002 Mathworks. (2018). *MATLAB*. The MathWorks Inc.
- 1003 Meissner, K., Bingel, U., Colloca, L., Wager, T. D., Watson, A., & Flaten, M. A. (2011). The  
1004 placebo effect: Advances from different methodological approaches. *Journal of*  
1005 *Neuroscience*, 31(45), 16117–16124. [https://doi.org/10.1523/JNEUROSCI.4099-](https://doi.org/10.1523/JNEUROSCI.4099-11.2011)  
1006 11.2011
- 1007 Mischkowski, D., Crocker, J., & Way, B. M. (2016). From painkiller to empathy killer:  
1008 Acetaminophen (paracetamol) reduces empathy for pain. *Social, Cognitive and Affective*  
1009 *Neuroscience*, 11(9), 1345–1353. <https://doi.org/10.1093/scan/nsw057>
- 1010 Morton, D. L., Sandhu, J. S., & Jones, A. K. P. (2016). Brain imaging of pain: State of the art.  
1011 *Journal of Pain Research*, 9, 613–624.
- 1012 Motoyama, Y., Ogata, K., Hoka, S., & Tobimatsu, S. (2017). Frequency-dependent changes  
1013 in sensorimotor and pain affective systems induced by empathy for pain. *Journal of Pain*  
1014 *Research*, 10, 1317–1326. <https://doi.org/10.2147/JPR.S129791>
- 1015 Murray, F. S., & Safferstone, J. F. (1970). Pain threshold and tolerance of right and left  
1016 hands. *Journal of Comparative and Physiological Psychology*, 71(1), 83–86.  
1017 <https://doi.org/10.1037/h0028963>
- 1018 Nosek, B. A., Ebersole, C. R., DeHaven, A. C., & Mellor, D. T. (2018). The preregistration  
1019 revolution. *Proceedings of the National Academy of Sciences of the United States of*  
1020 *America*, 115(11), 2600–2606. <https://doi.org/10.1073/pnas.1708274114>
- 1021 Ochsner, K. N., Zaki, J., Hanelin, J., Ludlow, D. H., Knierim, K., Ramachandran, T., Glover,  
1022 G. H., & Mackey, S. C. (2008). Your pain or mine? Common and distinct neural systems  
1023 supporting the perception of pain in self and other. *Social, Cognitive and Affective*  
1024 *Neuroscience*, 3(2), 144–160. <https://doi.org/10.1093/scan/nsn006>
- 1025 Ogino, Y., Nemoto, H., & Goto, F. (2005). Somatotopy in human primary somatosensory  
1026 cortex in pain system. *Anesthesiology*, 103(4), 821–827. [https://doi.org/00000542-](https://doi.org/00000542-200510000-00021)  
1027 200510000-00021 [pii]
- 1028 Omori, S., Iose, S., Otsuru, N., Nishihara, M., Kuwabara, S., Inui, K., & Kakigi, R. (2013).  
1029 Somatotopic representation of pain in the primary somatosensory cortex (S1) in  
1030 humans. *Clinical Neurophysiology*, 124(7), 1422–1430.  
1031 <https://doi.org/10.1016/j.clinph.2013.01.006>
- 1032 Osborn, J., & Derbyshire, S. W. G. (2010). Pain sensation evoked by observing injury in

- 1033 others. *Pain*, 148(2), 268–274. <https://doi.org/10.1016/j.pain.2009.11.007>
- 1034 Perchet, C., Frot, M., Charmarty, A., Flores, C., Mazza, S., Magnin, M., & Garcia-Larrea, L.  
1035 (2012). Do we activate specifically somatosensory thin fibres with the concentric planar  
1036 electrode? A scalp and intracranial EEG study. *Pain*, 153(6), 1244–1252.  
1037 <https://doi.org/10.1016/j.pain.2012.03.004>
- 1038 Petrovic, P., Kalso, E., Petersson, K. M., & Ingvar, M. (2002). Placebo and opioid analgesia -  
1039 imaging a shared neuronal network. *Science*, 295(5560), 1737–1740.  
1040 <https://doi.org/10.1126/science.1067176>
- 1041 Ploner, M., Gross, J., Timmermann, L., & Schnitzler, A. (2002). Cortical representation of first  
1042 and second pain sensation in humans. *Proceedings of the National Academy of  
1043 Sciences of the United States of America*, 99(19), 12444–12448.  
1044 <https://doi.org/10.1073/pnas.182272899>
- 1045 Ploner, M., Schmitz, F., & Freund, H.-J. (1999). Parallel activation of primary and secondary  
1046 somatosensory cortices in human pain processing. *Journal of Neurophysiology*, 81(6),  
1047 3100–3104. <https://doi.org/10.1152/jn.1999.81.6.3100>
- 1048 Ploner, M., Schmitz, F., & Freund, H.-J. (2000). Differential organization of touch and pain in  
1049 human primary somatosensory cortex. *Journal of Neurophysiology*, 83(3), 1770–1776.  
1050 <https://doi.org/10.1152/jn.2000.83.3.1770>
- 1051 Preston, S. D., & de Waal, F. B. M. (2002). Empathy: Its ultimate and proximate bases.  
1052 *Behavioral & Brain Sciences*, 25, 1–72.  
1053 <https://doi.org/https://doi.org/10.1017/S0140525X02000018>
- 1054 Price, D. D., Craggs, J., Nicholas Verne, G., Perlstein, W. M., & Robinson, M. E. (2007).  
1055 Placebo analgesia is accompanied by large reductions in pain-related brain activity in  
1056 irritable bowel syndrome patients. *Pain*, 127, 63–72.  
1057 <https://doi.org/10.1016/j.pain.2006.08.001>
- 1058 Pud, D., Golan, Y., & Pesta, R. (2009). Hand dominance - a feature affecting sensitivity to  
1059 pain. *Neuroscience Letters*, 467(3), 237–240.  
1060 <https://doi.org/10.1016/j.neulet.2009.10.048>
- 1061 R Core Team. (2019). *R: A language and environment for statistical computing*. R  
1062 Foundation for Statistical Computing. <https://www.r-project.org/>
- 1063 Riečanský, I., & Lamm, C. (2019). The role of sensorimotor processes in pain empathy. *Brain  
1064 Topography*, 32, 965–976. <https://doi.org/10.1007/s10548-019-00738-4>
- 1065 Ritter, C., Hebart, M. N., Wolbers, T., & Bingel, U. (2014). Representation of spatial  
1066 information in key areas of the descending pain modulatory system. *Journal of  
1067 Neuroscience*, 34(13), 4634–4639. <https://doi.org/10.1523/JNEUROSCI.4342-13.2014>
- 1068 Rouder, J. N., Speckman, P. L., Sun, D., Morey, R. D., & Iverson, G. (2009). Bayesian t tests  
1069 for accepting and rejecting the null hypothesis. *Psychonomic Bulletin and Review*, 16(2),  
1070 225–237. <https://doi.org/10.3758/PBR.16.2.225>
- 1071 Rütgen, M., Seidel, E.-M., Riečanský, I., & Lamm, C. (2015). Reduction of empathy for pain  
1072 by placebo analgesia suggests functional equivalence of empathy and first-hand  
1073 emotion experience. *Journal of Neuroscience*, 35(23), 8938–8947.  
1074 <https://doi.org/10.1523/JNEUROSCI.3936-14.2015>
- 1075 Rütgen, M., Seidel, E.-M., Silani, G., Riečanský, I., Hummer, A., Windischberger, C.,  
1076 Petrovic, P., & Lamm, C. (2015). Placebo analgesia and its opioidergic regulation  
1077 suggest that empathy for pain is grounded in self pain. *Proceedings of the National  
1078 Academy of Sciences of the United States of America*, 112(41), E5638–E5646.  
1079 <https://doi.org/10.1073/pnas.1511269112>
- 1080 Rütgen, M., Seidel, E. M., Pletti, C., Riečanský, I., Gartus, A., Eisenegger, C., & Lamm, C.  
1081 (2018). Psychopharmacological modulation of event-related potentials suggests that

- 1082 first-hand pain and empathy for pain rely on similar opioidergic processes.  
1083 *Neuropsychologia*, 116, 5–14. <https://doi.org/10.1016/j.neuropsychologia.2017.04.023>
- 1084 Schafer, S. M., Colloca, L., & Wager, T. D. (2015). Conditioned placebo analgesia persists  
1085 when subjects know they are receiving a placebo. *Journal of Pain*, 16(5), 412–420.  
1086 <https://doi.org/10.1016/j.jpain.2014.12.008>
- 1087 Schenk, L. A., Sprenger, C., Geuter, S., & Büchel, C. (2014). Expectation requires treatment  
1088 to boost pain relief: An fMRI study. *Pain*, 155(1), 150–157.  
1089 <https://doi.org/10.1016/j.pain.2013.09.024>
- 1090 Singer, T., & Frith, C. (2005). The painful side of empathy. *Nature Neuroscience*, 8(7), 845–  
1091 846. <https://doi.org/10.1038/nn0705-845>
- 1092 Singer, T., & Lamm, C. (2009). The social neuroscience of empathy. *Annals of the New York  
1093 Academy of Sciences*, 1156(1), 81–96. [https://doi.org/10.1111/j.1749-  
1094 6632.2009.04418.x](https://doi.org/10.1111/j.1749-6632.2009.04418.x)
- 1095 Singer, T., Seymour, B., O’Doherty, J., Dolan, R. J., Kaube, H., & Frith, C. D. (2004).  
1096 Empathy for pain involves the affective but not sensory components of pain. *Science*,  
1097 303(5661), 1157–1162. <https://doi.org/10.1126/science.1093535>
- 1098 Sladky, R., Friston, K. J., Tröstl, J., Cunnington, R., Moser, E., & Windischberger, C. (2011).  
1099 Slice-timing effects and their correction in functional MRI. *NeuroImage*, 58(2), 588–594.  
1100 <https://doi.org/10.1016/j.neuroimage.2011.06.078>
- 1101 Slagter, H. A., Prinssen, S., Reteig, L. C., & Mazaheri, A. (2016). Facilitation and inhibition in  
1102 attention: Functional dissociation of pre-stimulus alpha activity, P1, and N1 components.  
1103 *NeuroImage*, 125, 25–35. <https://doi.org/10.1016/j.neuroimage.2015.09.058>
- 1104 Symonds, L. L., Gordon, N. S., Bixby, J. C., & Mande, M. M. (2006). Right-lateralized pain  
1105 processing in the human cortex: An fMRI study. *Journal of Neurophysiology*, 95, 3823–  
1106 3830. <https://doi.org/10.1152/jn.01162.2005>
- 1107 Tamè, L., Braun, C., Lingnau, A., Schwarzbach, J., Demarchi, G., Li Hegner, Y., Farnè, A., &  
1108 Pavani, F. (2012). The contribution of primary and secondary somatosensory cortices to  
1109 the representation of body parts and body sides: An fMRI adaptation study. *Journal of  
1110 Cognitive Neuroscience*, 24(12), 2306–2320. [https://doi.org/10.1162/jocn\\_a\\_00272](https://doi.org/10.1162/jocn_a_00272)
- 1111 Timmers, I., Park, A. L., Fischer, M. D., Kronman, C. A., Heathcote, L. C., Hernandez, J. M.,  
1112 & Simons, L. E. (2018). Is empathy for pain unique in its neural correlates? A meta-  
1113 analysis of neuroimaging studies of empathy. *Frontiers in Behavioral Neuroscience*,  
1114 12(November), 289. <https://doi.org/10.3389/FNBEH.2018.00289>
- 1115 Tinnermann, A., Geuter, S., Sprenger, C., Finsterbusch, J., & Büchel, C. (2017). Interactions  
1116 between brain and spinal cord mediate value effects in placebo hyperalgesia. *Science*,  
1117 358(6359), 105–108. <https://doi.org/10.1126/science.aan1221>
- 1118 Tracey, I., & Mantyh, P. W. (2007). The cerebral signature for pain perception and its  
1119 modulation. *Neuron*, 55(3), 377–391. <https://doi.org/10.1016/j.neuron.2007.07.012>
- 1120 Vierck, C. J., Whitsel, B. L., Favorov, O. V., Brown, A. W., & Tommerdahl, M. (2013). Role of  
1121 primary somatosensory cortex in the coding of pain. *Pain*, 154(3), 334–344.  
1122 <https://doi.org/10.1016/j.pain.2012.10.021>
- 1123 Wagenmakers, E.-J., Marsman, M., Tahira Jamil, -, Ly, - Alexander, Verhagen, J., Love, J.,  
1124 Selker, R., Gronau, Q. F., Smíra, M., Epskamp, S., Matzke, D., Rouder, J. N., & Morey,  
1125 R. D. (2018). Bayesian inference for psychology. Part I: Theoretical advantages and  
1126 practical ramifications. *Psychonomic Bulletin & Review*, 25, 35–57.  
1127 <https://doi.org/10.3758/s13423-017-1343-3>
- 1128 Wager, T. D., & Atlas, L. Y. (2015). The neuroscience of placebo effects: Connecting context,  
1129 learning and health. *Nature Reviews Neuroscience*, 16(7), 403–418.  
1130 <https://doi.org/10.1038/nrn3976>

## Somatosensory empathic sharing

- 1131 Wager, T. D., Atlas, L. Y., Leotti, L. A., & Rilling, J. K. (2011). Predicting individual  
1132 differences in placebo analgesia: Contributions of brain activity during anticipation and  
1133 pain experience. *Journal of Neuroscience*, 31(2), 439–452.  
1134 <https://doi.org/10.1016/j.jacc.2007.01.076.White>
- 1135 Wager, T. D., Rilling, J. K., Smith, E. E., Sokolik, A., Casey, K. L., Davidson, R. J., Kosslyn,  
1136 S. M., Rose, R. M., & Cohen, J. D. (2004). Placebo-induced changes in fMRI in the  
1137 anticipation and experience of pain. *Science*, 303(5661), 1162–1167.  
1138 <https://doi.org/10.1126/science.1093065>
- 1139 Wicherts, J. M., Veldkamp, C. L. S., Augusteijn, H. E. M., Bakker, M., van Aert, R. C. M., &  
1140 van Assen, M. A. L. M. (2016). Degrees of freedom in planning, running, analyzing, and  
1141 reporting psychological studies: A checklist to avoid P-hacking. *Frontiers in Psychology*,  
1142 7(NOV), 1–12. <https://doi.org/10.3389/fpsyg.2016.01832>
- 1143 Xiang, Y., Wang, Y., Gao, S., Zhang, X., & Cui, R. (2018). Neural mechanisms with respect  
1144 to different paradigms and relevant regulatory factors in empathy for pain. *Frontiers in*  
1145 *Neuroscience*, 12(July), 1–8. <https://doi.org/10.3389/fnins.2018.00507>
- 1146 Xu, A., Larsen, B., Baller, E. B., Scott, J. C., Adebimpe, A., Basbaum, A. I., Dworkin, R. H.,  
1147 Edwards, R. R., Woolf, C. J., Eickhoff, S. B., Claudia, R., & Satterthwaite, T. D. (2020).  
1148 Convergent neural representations of experimentally-induced acute pain in healthy  
1149 volunteers: A large-scale fMRI meta-analysis. *Neuroscience and Biobehavioral*  
1150 *Reviews*, January. <https://doi.org/10.1016/j.neubiorev.2020.01.004>
- 1151 Zaki, J., Wager, T. D., Singer, T., Keysers, C., & Gazzola, V. (2016). The anatomy of  
1152 suffering: Understanding the relationship between nociceptive and empathic pain.  
1153 *Trends in Cognitive Sciences*, 20(4), 249–259. <https://doi.org/10.1016/j.tics.2016.02.003>
- 1154 Zhou, F., Li, J., Zhao, W., Xu, L., Zheng, X., Fu, M., Yao, S., Kendrick, K. M., Wager, T. D., &  
1155 Becker, B. (2020). Emotional contagion of pain across different social cues shares  
1156 common and process-specific neural representations. *BioRxiv*, 2020.02.24.963595.  
1157 <https://doi.org/10.1101/2020.02.24.963595>
- 1158 Zubieta, J.-K., Bueller, J. A., Jackson, L. R., Scott, D. J., Xu, Y., Koeppe, R. A., Nichols, T.  
1159 E., & Stohler, C. S. (2005). Placebo effects mediated by endogenous opioid activity on  
1160 mu-opioid receptors. *Journal of Neuroscience*, 25(34), 7754–7762.  
1161 <https://doi.org/10.1523/JNEUROSCI.0439-05.2005>
